# Supplementary material for: Radiosynthesis of [ 18 F]brequinar for in vivo PET imaging of hDHODH for potential studies of acute myeloid leukemia and cancers
Source: Royal Society of Chemistry journal article supplement (doi:10.1039/d4md00433g), 2024-01-01
Supplement: d4md00433g4.pdf [file d4md00433g4.pdf]

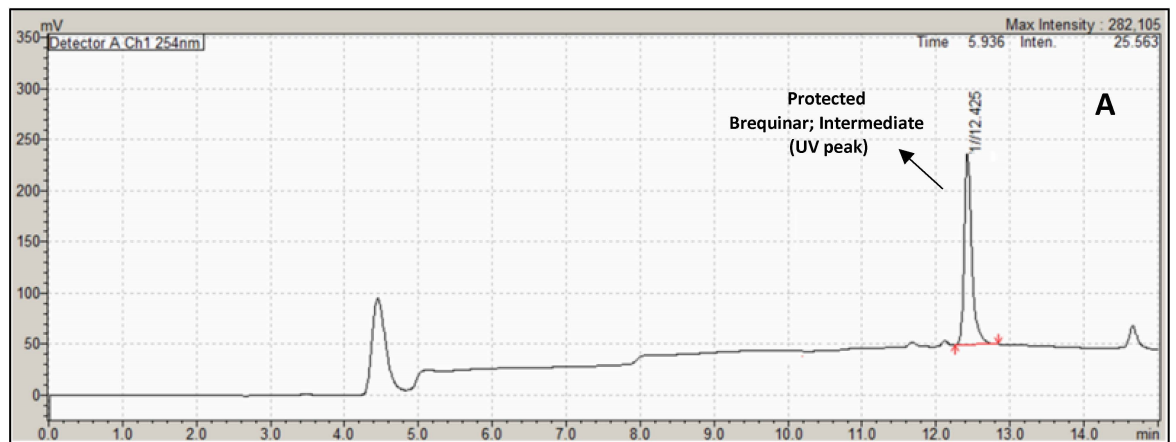

| Peak# | Ret. Time | Area    | Height | Mark | Conc.  |
|-------|-----------|---------|--------|------|--------|
| 1     | 12.425    | 1331062 | 188260 | M    | 44.298 |

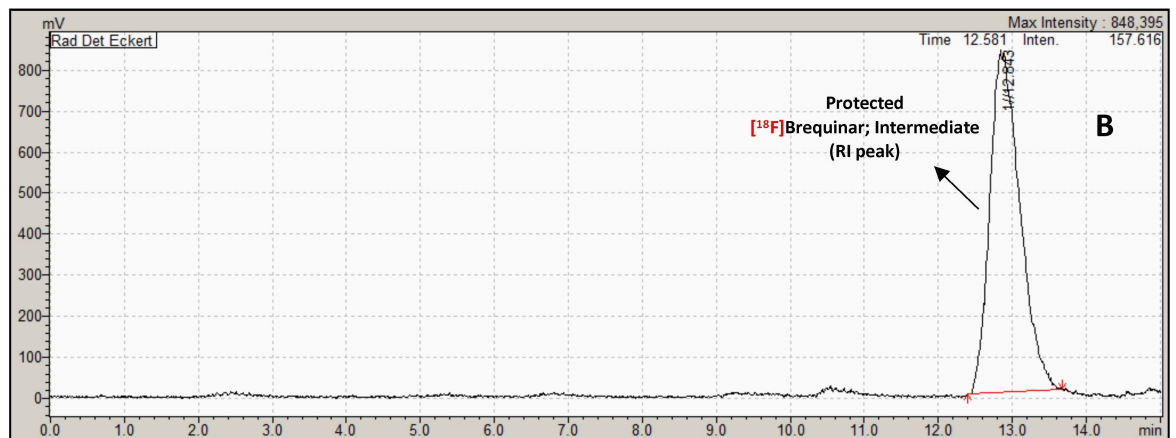

| Peak# | Ret. Time | Area     | Height | Mark | Conc.   |
|-------|-----------|----------|--------|------|---------|
| 1     | 12.843    | 23527378 | 832782 | M    | 100.000 |

Editable pictures

F-18 BreQ intermediate (gradient QC HPLC)
