# Supplementary material for: Radiosynthesis of [ 18 F]brequinar for in vivo PET imaging of hDHODH for potential studies of acute myeloid leukemia and cancers
Source: Royal Society of Chemistry journal article supplement (doi:10.1039/d4md00433g), 2024-01-01
Supplement: d4md00433g7.pdf [file d4md00433g7.pdf]

## Radiosynthesis of [<sup>18</sup>F]Brequinar for *in vivo* PET Imaging of hDHODH for Potential Studies of Acute Myeloid Leukemia and Cancers

Vinay Kumar<sup>1†</sup>, Stefano Sainas<sup>3†</sup>, Elena Martino<sup>3</sup>, Jiacheng Wang<sup>1</sup>, Marco Lucio Lolli<sup>3‡</sup>, Yu-Shin Ding, PhD<sup>1,2, ‡\*</sup>

<sup>1</sup>Department of Radiology, New York University School of Medicine, New York, NY, USA.

<sup>2</sup>Department of Psychiatry, New York University School of Medicine, New York, NY, USA.

<sup>3</sup>Department of Drug Science and Technology (DSTF), University of Torino, Turin, Italy.

† equal contribution as the 1<sup>st</sup> author

‡ equal contribution as the senior author

\*corresponding author

### Supporting Information

| Table of Content |                                                                                                                                                        |
|------------------|--------------------------------------------------------------------------------------------------------------------------------------------------------|
| Page S2 – S4     | Chemical Synthesis                                                                                                                                     |
| Page S5 -S15     | <sup>1</sup> H-NMR and <sup>13</sup> C-NMR for Compounds 1-5                                                                                           |
| Page S16         | HPLC analysis of borono-precursor (Compound <b>4</b> )                                                                                                 |
| Page S17         | HPLC analysis of Sn-precursor (Compound <b>5</b> )                                                                                                     |
| Page S18         | Figure S1. UPLC gradient method                                                                                                                        |
| Page S19         | Figure S2. GE Healthcare Tracerlab FX2N automodule instrument design and software flow diagram                                                         |
| Page S20         | Figure S3. Analytical QC HPLC (analysis was performed using the gradient method) chromatogram of protected [ <sup>18</sup> F]brequinar (intermediate). |
| Page S21         | Figure S4: Analytical QC HPLC (analysis was performed using the isocratic method) chromatogram of [ <sup>18</sup> F]brequinar.                         |
| Page S22         | Figure S5. PET/CT dynamic images_video.pptx                                                                                                            |
| Page S23         | Table S1. Preparation of reagents for the GE Tracerlab FX2N synthesis module (should be right after Figure S2)                                         |

## Chemical Synthesis

### Procedures for the synthesis of compounds 1-5 are described in the Supporting Information (SI)

*1-(2'-Fluoro-[1,1'-biphenyl]-4-yl)propan-1-one (1)*. 1-(4-Bromophenyl)propan-1-one (1.00 g, 4.69 mmol), K<sub>2</sub>CO<sub>3</sub> (1.95 g, 14.08 mmol), and Pd[P(Ph)<sub>3</sub>]<sub>4</sub> (0.54 g, 0.94 mmol) was dissolved in 100 mL of a solution dioxane/water (8:2 v / v) kept under nitrogen atmosphere. The mixture was stirred for 85 minutes, then (2-fluorophenyl)boronic acid (1.31 g, 9.39 mmol) was added, and the reaction mixture was stirred at 100 °C for 5 hours. Upon completion, the reaction mixture was cooled to room temperature, water (500 mL) was added, and the resulting mixture was extracted using EtOAc (3 x 100 mL). The combined organic layers were washed with brine, dried over anhyd. Na<sub>2</sub>SO<sub>4</sub>, and concentrated under reduced pressure. The crude product was purified by flash chromatography (eluent: *petroleum ether* / EtOAc 90/10 v / v) to afford the title compound as a white solid. Yield 95 %. <sup>1</sup>H NMR (600 MHz, *Chloroform-d*): δ 1.25 (*t*, 3H, J = 7.2 Hz, -CH<sub>2</sub>CH<sub>3</sub>), 3.04 (*q*, 2H, J = 7.2 Hz, -CH<sub>2</sub>CH<sub>3</sub>), 7.17 (*ddd*, 1H, J = 10.7, 8.3, 1.0 Hz), 7.24 (*td*, 1H, J = 7.5, 1.1 Hz), 7.33 – 7.40 (*m*, 1H), 7.46 (*td*, 1H, J = 7.7, 1.7 Hz), 7.65 (*dd*, 2H, J = 8.4, 1.6 Hz), 8.04 (*d*, 2H, J = 8.4 Hz). <sup>13</sup>C NMR (151 MHz, *Chloroform-d*): δ 8.4 (-CH<sub>2</sub>CH<sub>3</sub>), 32.0 (-CH<sub>2</sub>CH<sub>3</sub>), 116.4 (*d*, J = 22.4 Hz), 124.7 (*d*, J = 3.8 Hz), 128.1 (*d*, J = 13.1 Hz), 128.3, 129.3 (*d*, J = 2.5 Hz), 130.0 (*d*, J = 8.3 Hz), 130.7 (*d*, J = 2.5 Hz), 136.0, 140.4, 159.9 (*d*, J = 249.1 Hz, C-F), 200.5. (MS) (ES<sup>+</sup>) 229 (M+1).

### General procedure for the synthesis of compounds 2a-d:

KOH (6.0 eq.) was added to a solution of appropriate isatin (1.5 eq.) in EtOH/H<sub>2</sub>O (2 : 1 v / v). The resulting dark solution was stirred at room temperature for 15 min then 4'-(2-fluorophenyl)propiophenone (1.0 eq.) was added and the mixture was heated at reflux overnight. Upon completion of the reaction, checked by TLC, the mixture was cooled to room temperature and concentrated under reduced pressure to remove EtOH, then diluted with 1M KOH solution. The basic mixture was then acidified until pH 5 by adding acetic acid and observing precipitation. The solid precipitate was isolated by filtration and recrystallized with EtOH to afford the title compound as a solid.

*2-(2'-Fluoro-[1,1'-biphenyl]-4-yl)-3-methylquinoline-4-carboxylic acid (2a)*. White solid. Yield 88 %. <sup>1</sup>H NMR (600 MHz, *DMSO-d*<sub>6</sub>): δ 2.46 (*s*, 3H, -CH<sub>3</sub>), 7.33 – 7.39 (*m*, 2H), 7.44 – 7.49 (*m*, 1H), 7.64 (*td*, 1H, J = 7.9, 1.4 Hz), 7.66 – 7.83 (*m*, 7H), 8.06 (*d*, 1H, J = 8.3 Hz). <sup>13</sup>C NMR (151 MHz, *DMSO-d*<sub>6</sub>): δ 17.6 (-CH<sub>3</sub>), 116.2 (*d*, J = 22.3 Hz), 122.5, 123.9, 124.4, 125.1 (*d*, J = 2.6 Hz), 127.6, 127.8 (*d*, J = 12.9 Hz), 128.6 (*d*, J = 1.8 Hz), 129.2, 129.4, 129.5, 129.9 (*d*, J = 8.2 Hz), 130.8 (*d*, J = 3.2 Hz), 135.1, 139.6, 141.3, 145.7, 159.2 (*d*, J = 245.5 Hz, C-F), 160.0, 168.9. (MS) (ES<sup>-</sup>) 356 (M-1).

*6-Fluoro-2-(2'-fluoro-[1,1'-biphenyl]-4-yl)-3-methylquinoline-4-carboxylic acid (2b)*. White solid. Yield 88 %. <sup>1</sup>H NMR (600 MHz, *DMSO-d*<sub>6</sub>): δ 2.47 (*s*, 3H, -CH<sub>3</sub>), 7.33 – 7.39 (*m*, 2H), 7.43 – 7.49 (*m*, 1H), 7.50 (*dd*, 1H, J = 9.7, 2.7 Hz), 7.63 (*td*, 1H, J = 7.8, 1.5 Hz), 7.69 – 7.76 (*m*, 5H), 8.15 (*dd*, 1H, J = 9.2, 5.6 Hz). <sup>13</sup>C NMR (151 MHz, *DMSO-d*<sub>6</sub>): δ 17.8 (-CH<sub>3</sub>), 107.7 (*d*, J = 23.5 Hz), 116.2 (*d*, J = 22.1 Hz), 119.7 (*d*, J = 25.9 Hz), 123.2 (*d*, J = 10.0 Hz), 125.1 (*d*, J = 2.6 Hz), 125.4, 127.7 (*d*, J = 13.0 Hz), 128.6, 129.4, 129.9 (*d*, J = 8.4 Hz), 130.8 (*d*, J = 2.4 Hz), 132.4 (*d*, J = 9.7 Hz), 135.2, 139.3, 140.4 (*d*, J = 5.2 Hz), 143.0, 159.2 (*d*, J = 246.4 Hz, C-F), 159.6, 160.4 (*d*, J = 246.7 Hz, C-F), 168.4. (MS) (ES<sup>-</sup>) 374 (M-1).

*6-Bromo-2-(2'-fluoro-[1,1'-biphenyl]-4-yl)-3-methylquinoline-4-carboxylic acid (2c)*. White solid. Yield 63 %. <sup>1</sup>H NMR (600 MHz, *DMSO-d*<sub>6</sub>): δ 2.46 (*s*, 3H, -CH<sub>3</sub>), 7.32 – 7.38 (*m*, 2H), 7.44 – 7.50 (*m*, 1H), 7.63 (*dd*, 1H, J = 8.6, 7.5 Hz), 7.70 (*d*, 2H, J = 7.7 Hz), 7.75 (*d*, 2H, J = 8.2 Hz), 7.92 (*dd*, 1H, J = 8.9, 2.2 Hz), 7.95 (*d*, 1H, J = 1.9 Hz), 8.01 (*d*, 1H, J = 8.9 Hz). <sup>13</sup>C NMR (151 MHz, *DMSO-*

$d_6$ ):  $\delta$  17.8 (-CH<sub>3</sub>), 116.2 (*d*, *J* = 22.5 Hz), 120.7, 123.7, 125.1 (*d*, *J* = 2.5 Hz), 125.6, 126.2, 127.7 (*d*, *J* = 13.1 Hz), 128.6, 129.40, 129.9 (*d*, *J* = 8.3 Hz), 130.8 (*d*, *J* = 2.1 Hz), 131.6, 132.7, 135.3, 139.2, 140.1, 144.3, 159.2 (*d*, *J* = 245.8 Hz, C-F), 160.4, 168.4. (MS) (ES<sup>-</sup>) 434/436 (M-1).

2-(2'-Fluoro-[1,1'-biphenyl]-4-yl)-6-iodo-3-methylquinoline-4-carboxylic acid (**2d**). White solid. Yield 86 %. <sup>1</sup>H NMR (600 MHz, DMSO-*d*<sub>6</sub>):  $\delta$  2.46 (*s*, 3H, -CH<sub>3</sub>), 7.33 – 7.38 (*m*, 2H), 7.44 – 7.49 (*m*, 1H), 7.63 (*td*, 1H, *J* = 7.9, 1.4 Hz), 7.71 (*d*, 2H, *J* = 8.1 Hz), 7.75 (*d*, 2H, *J* = 8.3 Hz), 7.92 (*dd*, 1H, *J* = 8.9, 2.1 Hz), 7.95 (*d*, 1H, *J* = 2.0 Hz), 8.02 (*d*, 1H, *J* = 8.9 Hz). <sup>13</sup>C NMR (151 MHz, DMSO-*d*<sub>6</sub>):  $\delta$  17.8 (-CH<sub>3</sub>), 116.2 (*d*, *J* = 22.1 Hz), 120.7, 123.7, 125.1 (*d*, *J* = 3.1 Hz), 125.6, 126.2, 127.7 (*d*, *J* = 13.0 Hz), 128.6, 129.4, 129.9 (*d*, *J* = 8.2 Hz), 130.8 (*d*, *J* = 3.3 Hz), 131.6, 132.7, 135.3, 139.2, 140.1, 144.3, 159.2 (*d*, *J* = 245.7 Hz, C-F), 160.4, 168.4. (MS) (ES<sup>-</sup>) 482 (M-1).

#### General procedure for the synthesis of compounds 3a-d:

Cs<sub>2</sub>CO<sub>3</sub> (3.0 eq.) was added to a solution of the corresponding brequinar analogue **2a - d** (1.0 eq.) in dry DMF (25 mL). The resulting suspension was stirred for 15 min at room temperature, then 4-nitrobenzylbromide (1.2 eq.) was added, and the reaction mixture was stirred at room temperature for 3 hours. The pale pink suspension was diluted with water (150 mL), observing precipitation. The precipitate was isolated by filtration, dried, and then triturated with hexane. The obtained solid was crystallized from ethanol to afford the final compound as a solid.

4-Nitrobenzyl 2-(2'-fluoro-[1,1'-biphenyl]-4-yl)-3-methylquinoline-4-carboxylate (**3a**). White solid. Yield 88 %. <sup>1</sup>H NMR (600 MHz, Chloroform-*d*):  $\delta$  2.44 (*s*, 3H, Ar-CH<sub>3</sub>), 5.64 (*s*, 2H, -OCH<sub>2</sub>Ar), 7.19 (*ddd*, 1H, *J* = 10.7, 8.2, 1.1 Hz), 7.23 – 7.27 (*m*, 1H), 7.33 – 7.38 (*m*, 1H), 7.49 (*dt*, 1H, *J* = 7.7, 1.8 Hz), 7.57 (*ddd*, 1H, *J* = 8.3, 6.9, 1.2 Hz), 7.64 - 7.71 (*m*, 7H), 7.73 (*ddd*, 1H, *J* = 8.4, 6.9, 1.3 Hz), 8.18 (*d*, 1H, *J* = 8.3 Hz), 8.28 (*d*, 2H, *J* = 8.8 Hz). <sup>13</sup>C NMR (151 MHz, Chloroform-*d*):  $\delta$  18.2 (Ar-CH<sub>3</sub>), 66.2 (-OCH<sub>2</sub>Ar), 116.3 (*d*, *J* = 22.9 Hz), 123.4, 123.9, 124.2, 124.6 (*d*, *J* = 3.2 Hz), 125.8, 127.9, 128.6 (*d*, *J* = 13.2 Hz), 129.2 (2 x C), 129.3 (*d*, *J* = 2.5 Hz), 129.4 (*d*, *J* = 8.4 Hz), 129.7, 130.0, 130.9 (*d*, *J* = 3.6 Hz), 136.4, 138.8, 142.2, 146.3, 148.2, 159.9 (*d*, *J* = 248.3 Hz), 160.4, 167.7. (MS) (ES<sup>+</sup>) 493 (M+1).

4-Nitrobenzyl-6-fluoro-2-(2'-fluoro-[1,1'-biphenyl]-4-yl)-3-methylquinoline-4-carboxylate (**3b**). White solid. Yield 86 %. <sup>1</sup>H NMR (600 MHz, Chloroform-*d*):  $\delta$  2.44 (*s*, 3H, Ar-CH<sub>3</sub>), 5.64 (*s*, 2H, -OCH<sub>2</sub>Ar), 7.16 – 7.22 (*m*, 1H), 7.23 – 7.27 (*m*, 1H), 7.31 (*d*, 1H, *J* = 9.2 Hz), 7.33 – 7.39 (*m*, 1H), 7.47 – 7.53 (*m*, 2H), 7.64 (*d*, 2H, *J* = 7.5 Hz), 7.66 – 7.72 (*m*, 4H), 8.17– 8.23 (*m*, 1H), 8.29 (*d*, 2H, *J* = 7.8 Hz). <sup>13</sup>C NMR (151 MHz, Chloroform-*d*):  $\delta$  18.4 (Ar-CH<sub>3</sub>), 66.4 (-OCH<sub>2</sub>Ar), 107.7 (*d*, *J* = 23.7 Hz), 116.4 (*d*, *J* = 23.0 Hz), 120.1 (*d*, *J* = 25.4 Hz), 120.2, 123.8, 124.2, 124.6 (*d*, *J* = 2.5 Hz), 127.1, 128.5 (*d*, *J* = 13.5 Hz), 129.2, 129.3, 129.5 (*d*, *J* = 8.1 Hz), 130.9 (*d*, *J* = 2.0 Hz), 132.6 (*d*, *J* = 9.7 Hz), 136.5, 137.6, 142.0, 148.3, 159.8, 160.0 (*d*, *J* = 248.7 Hz, C-F), 161.3 (*d*, *J* = 249.8 Hz, C-F), 167.3. (MS) (ES<sup>+</sup>) 511 (M+1).

4-Nitrobenzyl-6-bromo-2-(2'-fluoro-[1,1'-biphenyl]-4-yl)-3-methylquinoline-4-carboxylate (**3c**). White solid. Yield 91 %. <sup>1</sup>H NMR (600 MHz, Chloroform-*d*):  $\delta$  2.44 (*s*, 3H, Ar-CH<sub>3</sub>), 5.65 (*s*, 2H, -OCH<sub>2</sub>Ar), 7.17 – 7.21 (*m*, 1H), 7.23 – 7.27 (*m*, 1H), 7.33 – 7.39 (*m*, 1H), 7.49 (*td*, 1H, *J* = 7.7, 1.3 Hz), 7.64 (*d*, 2H, *J* = 8.1 Hz), 7.67 – 7.73 (*m*, 4H), 7.75 (*d*, 1H, *J* = 1.8 Hz), 7.78 (*dd*, 1H, *J* = 8.9, 1.9 Hz), 8.03 (*d*, 1H, *J* = 8.9 Hz), 8.31 (*d*, 2H, *J* = 8.6 Hz). <sup>13</sup>C NMR (151 MHz, Chloroform-*d*):  $\delta$  18.3 (Ar-CH<sub>3</sub>), 66.5 (-OCH<sub>2</sub>Ar), 116.4 (*d*, *J* = 22.7 Hz), 122.1, 124.3, 124.5, 124.6 (*d*, *J* = 2.5 Hz), 126.2, 127.1, 128.5 (*d*, *J* = 12.9 Hz), 129.2, 129.3 (*d*, *J* = 1.9 Hz), 129.5, 129.6, 130.9 (*d*, *J* = 2.0 Hz), 131.5, 133.3, 136.6, 137.9, 138.8, 141.9, 144.8, 148.3, 160.0 (*d*, *J* = 248.4 Hz), 160.7, 167.1. (MS) (ES<sup>+</sup>) 571/573 (M+1).

**4-Nitrobenzyl-2-(2'-fluoro-[1,1'-biphenyl]-4-yl)-6-iodo-3-methylquinoline-4-carboxylate (3d).** White solid. Yield 84%. <sup>1</sup>H NMR (600 MHz, *Chloroform-d*): δ 2.45 (s, 3H, Ar-CH<sub>3</sub>), 5.64 (s, 2H, -OCH<sub>2</sub>Ar), 7.16 - 7.21 (m, 1H), 7.22 - 7.27 (m, 1H), 7.33 - 7.38 (m, 1H), 7.49 (td, 1H, J = 7.8, 1.2 Hz), 7.64 (d, 2H, J = 8.1 Hz), 7.67 - 7.73 (m, 4H), 7.87 (d, 1H, J = 8.7 Hz), 7.91 - 7.95 (m, 2H), 8.33 (d, 2H, J = 8.6 Hz). <sup>13</sup>C NMR (151 MHz, *Chloroform-d*): δ 18.3 (Ar-CH<sub>3</sub>), 66.4 (-OCH<sub>2</sub>Ar), 93.7, 116.4 (d, J = 22.3 Hz), 124.3, 124.6 (d, J = 3.7 Hz), 125.0, 126.8, 128.47, 128.3 (d, J = 13.2 Hz), 129.1, 129.3 (d, J = 2.1 Hz), 129.5, 129.6, 130.9 (d, J = 2.8 Hz), 131.7, 132.8, 136.5, 137.4, 138.4, 139.2, 142.0, 145.3, 148.3, 159.9 (d, J = 248.4 Hz), 161.0, 167.2. (MS) (ES<sup>+</sup>) 619 (M+1).

**4-Nitrobenzyl-2-(2'-fluoro-[1,1'-biphenyl]-4-yl)-3-methyl-6-(4,4,5,5-tetramethyl-1,3,2-dioxaborolan-2-yl)quinoline-4-carboxylate (4).** NaOAc (86.3 mg, 1.06 mmol), 4-nitrobenzyl 6-bromo-2-(2'-fluoro-[1,1'-biphenyl]-4-yl)-3-methylquinoline-4-carboxylate (200 mg, 0.35 mmol) and [1,1'-bis(diphenylphosphino)ferrocene]dichloropalladium(II) (Pd(dppf)Cl<sub>2</sub>, 7.68 mg, 0.01 mmol) were dissolved in dioxane (5 mL). The mixture, kept under nitrogen atmosphere, was stirred for 20 minutes, then bis(pinacolato)diboron (98 mg, 0.385 mmol) was added and the mixture was stirred at 100 °C for 48 hours. Upon completion of the reaction, checked by TLC, the solution was cooled at room temperature and the solvent was evaporated under reduced pressure. The crude product was purified by flash chromatography (eluent: from *petroleum ether* to *petroleum ether* / EtOAc 95/5 v / v) to afford the title compound as white solid. Yield 30 %. <sup>1</sup>H NMR (600 MHz, *Chloroform-d*): δ 1.38 (s, 12H, -OC(CH<sub>3</sub>)<sub>2</sub>), 2.46 (s, 3H, Ar-CH<sub>3</sub>), 5.67 (s, 2H, -OCH<sub>2</sub>Ar), 7.19 (ddd, 1H, J = 10.5, 8.2, 0.7 Hz), 7.23 - 7.27 (m, 1H), 7.33 - 7.39 (m, 1H), 7.50 (t, 1H, J = 7.2 Hz), 7.64 - 7.71 (m, 4H), 7.73 (d, 2H, J = 8.4 Hz), 8.10 (d, 1H, J = 7.9 Hz), 8.13 - 8.18 (m, 1H), 8.19 (s, 1H), 8.30 (d, 2H, J = 8.3 Hz). <sup>13</sup>C NMR (151 MHz, *Chloroform-d*): δ 18.3 (Ar-CH<sub>3</sub>), 25.1 (-OC(CH<sub>3</sub>)<sub>2</sub>), 66.4 (-OCH<sub>2</sub>Ar), 84.1(-OC(CH<sub>3</sub>)<sub>2</sub>), 116.3 (d, J = 22.9 Hz), 122.7, 124.2, 124.6 (d, J = 2.9 Hz), 125.8, 128.6 (d, J = 13.1 Hz), 129.0, 129.28, 129.30, 129.4 (d, J = 8.2 Hz), 130.9 (d, J = 2.4 Hz), 131.8, 134.7, 136.4, 137.9, 139.1, 139.3, 139.4, 142.4, 147.7, 148.1, 160.0 (d, J = 248.2 Hz), 161.2, 167.8. (MS) (ES<sup>+</sup>) 619 (M+1).

**4-Nitrobenzyl-2-(2'-fluoro-[1,1'-biphenyl]-4-yl)-3-methyl-6-(tributylstannyl)quinoline-4-carboxylate (5).** A solution of 4-nitrobenzyl-2-(2'-fluoro-[1,1'-biphenyl]-4-yl)-6-iodo-3-methylquinoline-4-carboxylate (200 mg, 1.62 mmol), LiCl (68.6 mg, 1.62 mmol) and Pd[(PPh<sub>3</sub>)<sub>4</sub>] (18.7 mg, 0.016 mmol) in 10 mL of dioxane under nitrogen atmosphere was stirred for 20 minutes, then hexabutylstannane (0.326 mL, 0.64 mmol) was added and the resulting mixture was stirred at 100 °C for 10 hours. The reaction mixture was filtered on silica gel (silica gel and 10 % K<sub>2</sub>CO<sub>3</sub>, eluent: *petroleum ether*) to remove the insoluble precipitate, then concentrated under reduced pressure. The pale-yellow oil was treated with MeOH to precipitate the final compound as a white solid. Yield 35 %. <sup>1</sup>H NMR (600 MHz, *Chloroform-d*): δ 0.88 (t, 9H, J = 7.3 Hz, -Sn(CH<sub>2</sub>CH<sub>2</sub>CH<sub>2</sub>CH<sub>3</sub>)<sub>3</sub>), 1.05 - 1.11 (m, 6H, -Sn(CH<sub>2</sub>CH<sub>2</sub>CH<sub>2</sub>CH<sub>3</sub>)<sub>3</sub>), 1.28 - 1.36 (m, 6H, -Sn(CH<sub>2</sub>CH<sub>2</sub>CH<sub>2</sub>CH<sub>3</sub>)<sub>3</sub>), 1.50 - 1.57 (m, 6H, -Sn(CH<sub>2</sub>CH<sub>2</sub>CH<sub>2</sub>CH<sub>3</sub>)<sub>3</sub>), 2.44 (s, 3H, Ar-CH<sub>3</sub>), 5.64 (s, 2H, -OCH<sub>2</sub>Ar), 7.19 (dd, 1H, J = 10.5, 8.4 Hz), 7.23 - 7.27 (m, 1H), 7.33 - 7.38 (m, 1H), 7.49 (td, 1H, J = 7.7, 1.6 Hz), 7.64 (d, 2H, J = 8.2 Hz), 7.66 - 7.70 (m, 4H), 7.74 (s, 1H), 7.81 (d, 1H, J = 8.2 Hz), 8.10 (d, 1H, J = 8.2 Hz), 8.28 (d, 2H, J = 8.8 Hz). <sup>13</sup>C NMR (151 MHz, *Chloroform-d*): δ 10.0 (-Sn(CH<sub>2</sub>CH<sub>2</sub>CH<sub>2</sub>CH<sub>3</sub>)<sub>3</sub>), 13.8 (-Sn(CH<sub>2</sub>CH<sub>2</sub>CH<sub>2</sub>CH<sub>3</sub>)<sub>3</sub>), 18.20 (Ar-CH<sub>3</sub>), 27.5 (-Sn(CH<sub>2</sub>CH<sub>2</sub>CH<sub>2</sub>CH<sub>3</sub>)<sub>3</sub>), 29.2 (-Sn(CH<sub>2</sub>CH<sub>2</sub>CH<sub>2</sub>CH<sub>3</sub>)<sub>3</sub>), 66.0 (-OCH<sub>2</sub>Ar), 116.3 (d, J = 22.6 Hz), 123.0, 124.2, 124.6 (d, J = 2.5 Hz), 125.5, 128.7 (d, J = 13.0 Hz), 128.72, 129.1, 129.2, 129.3 (d, J = 1.8 Hz), 129.4 (d, J = 8.1 Hz), 130.9 (d, J = 2.3 Hz), 132.0, 136.2, 137.0, 138.2, 139.7, 142.3, 143.3, 146.4, 148.1, 160.0 (d, J = 248.3 Hz), 160.1, 168.0. (MS) (ES<sup>+</sup>) 781 (<sup>116</sup>Sn), 783 (<sup>118</sup>Sn), 784 (<sup>119</sup>Sn), 785 (<sup>120</sup>Sn) (M+1).

1-(2'-Fluoro-[1,1'-biphenyl]-4-yl)propan-1-one (**1**)

8.05  
8.03  
7.65  
7.65  
7.64  
7.64  
7.47  
7.47  
7.46  
7.46  
7.45  
7.44  
7.25  
7.25  
7.24  
7.24  
7.22  
7.22  
7.19  
7.19  
7.18  
7.18  
7.17  
7.17  
7.17  
7.16  
7.16

3.06  
3.04  
3.03  
3.02

1.27  
1.25  
1.24

<sup>1</sup>H NMR Spectrum (CDCl<sub>3</sub>)

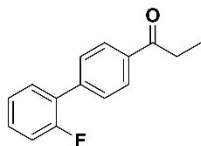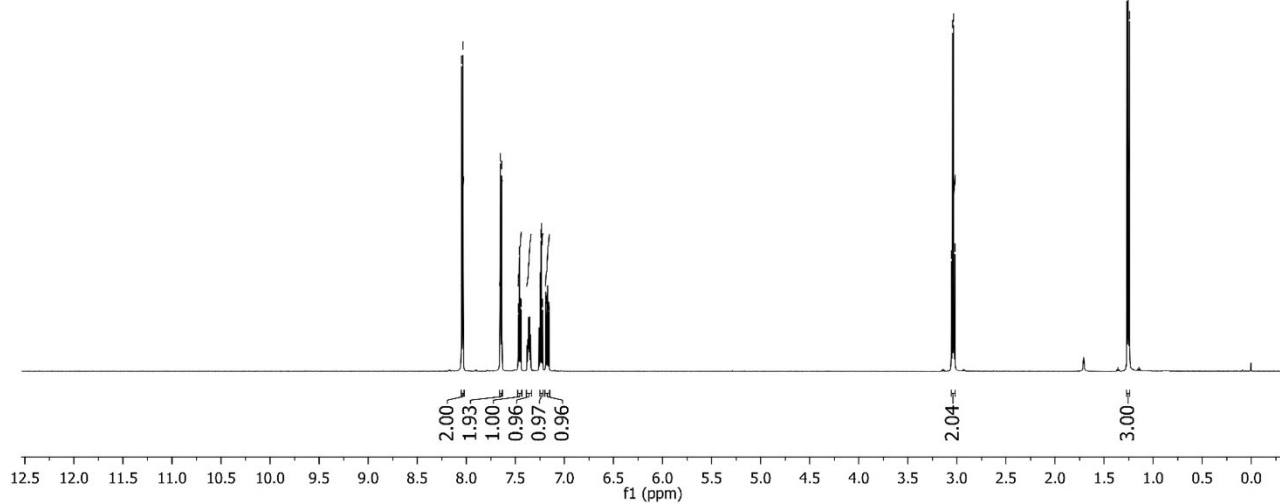

200.52

160.68  
159.03  
140.43  
136.01  
130.73  
130.71  
129.98  
129.92  
129.30  
129.29  
128.25  
128.10  
128.01  
124.67  
124.64  
116.47  
116.32

31.97

8.38

<sup>13</sup>C NMR Spectrum (CDCl<sub>3</sub>)

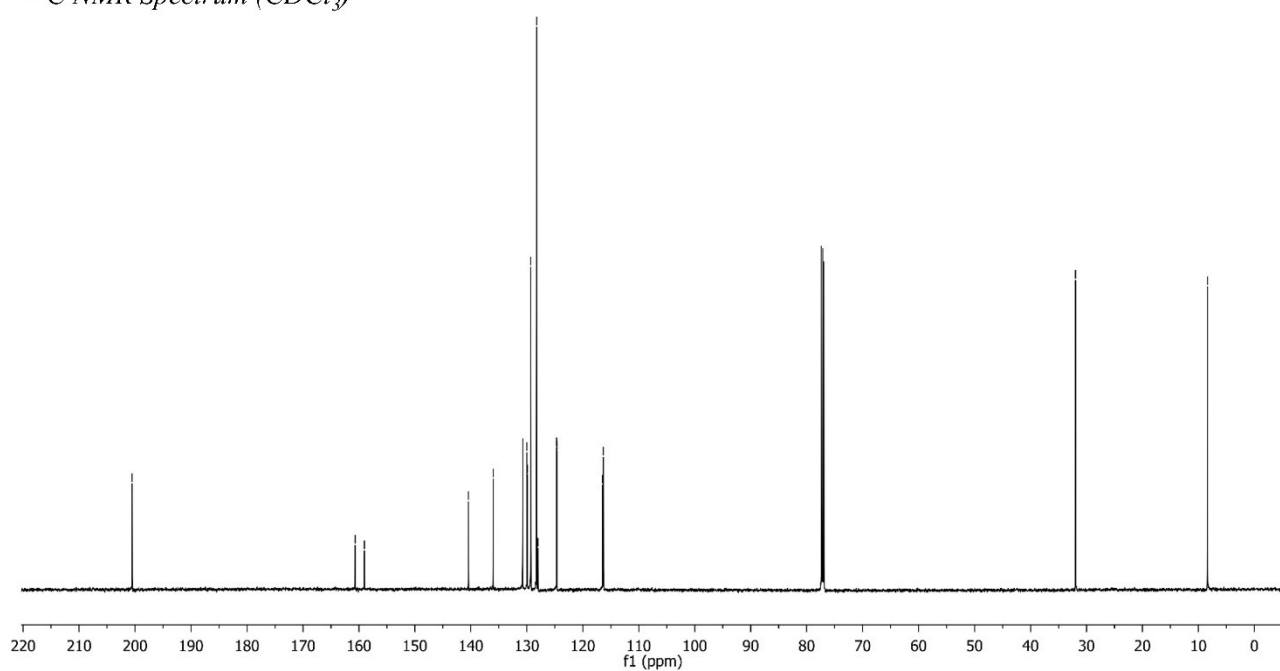

2-(2'-Fluoro-[1,1'-biphenyl]-4-yl)-3-methylquinoline-4-carboxylic acid (**2a**)

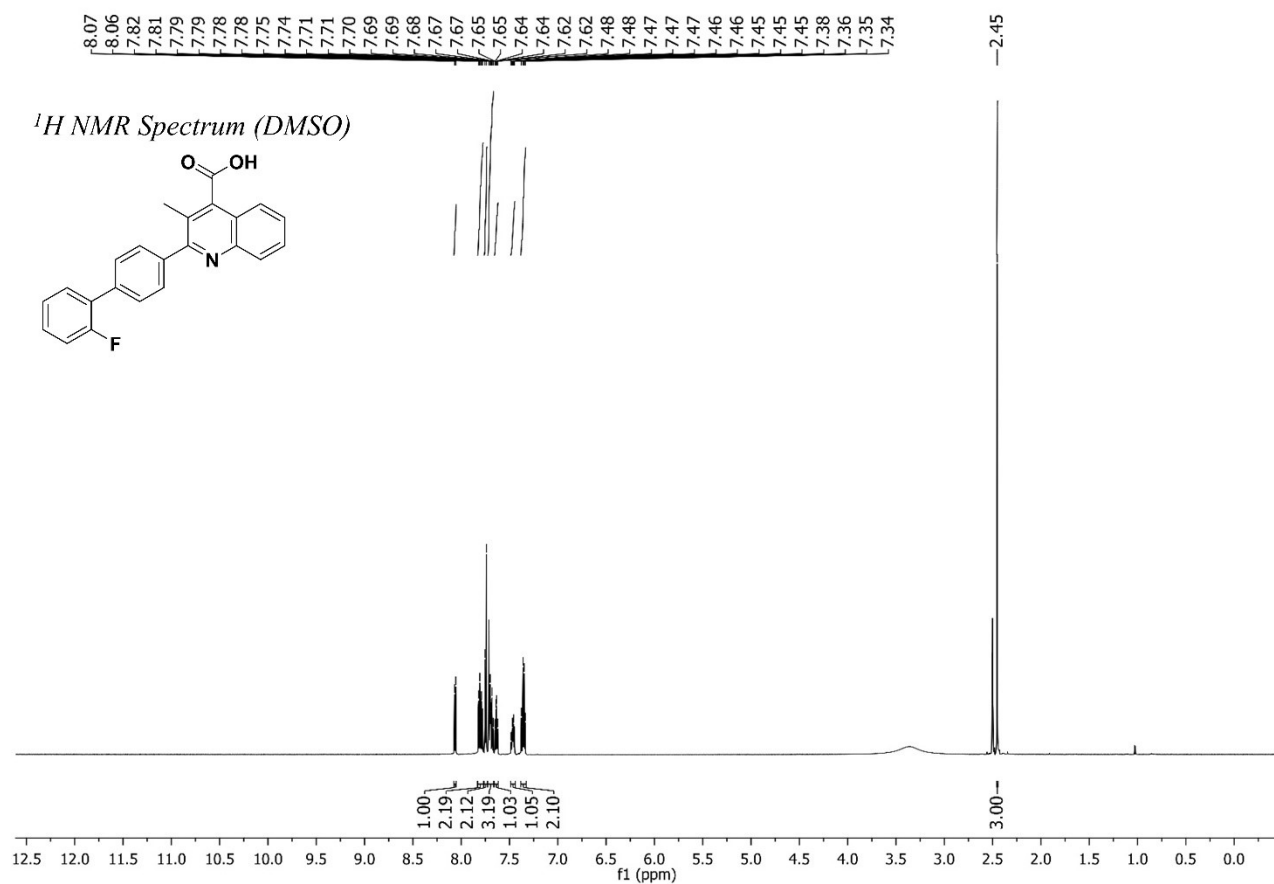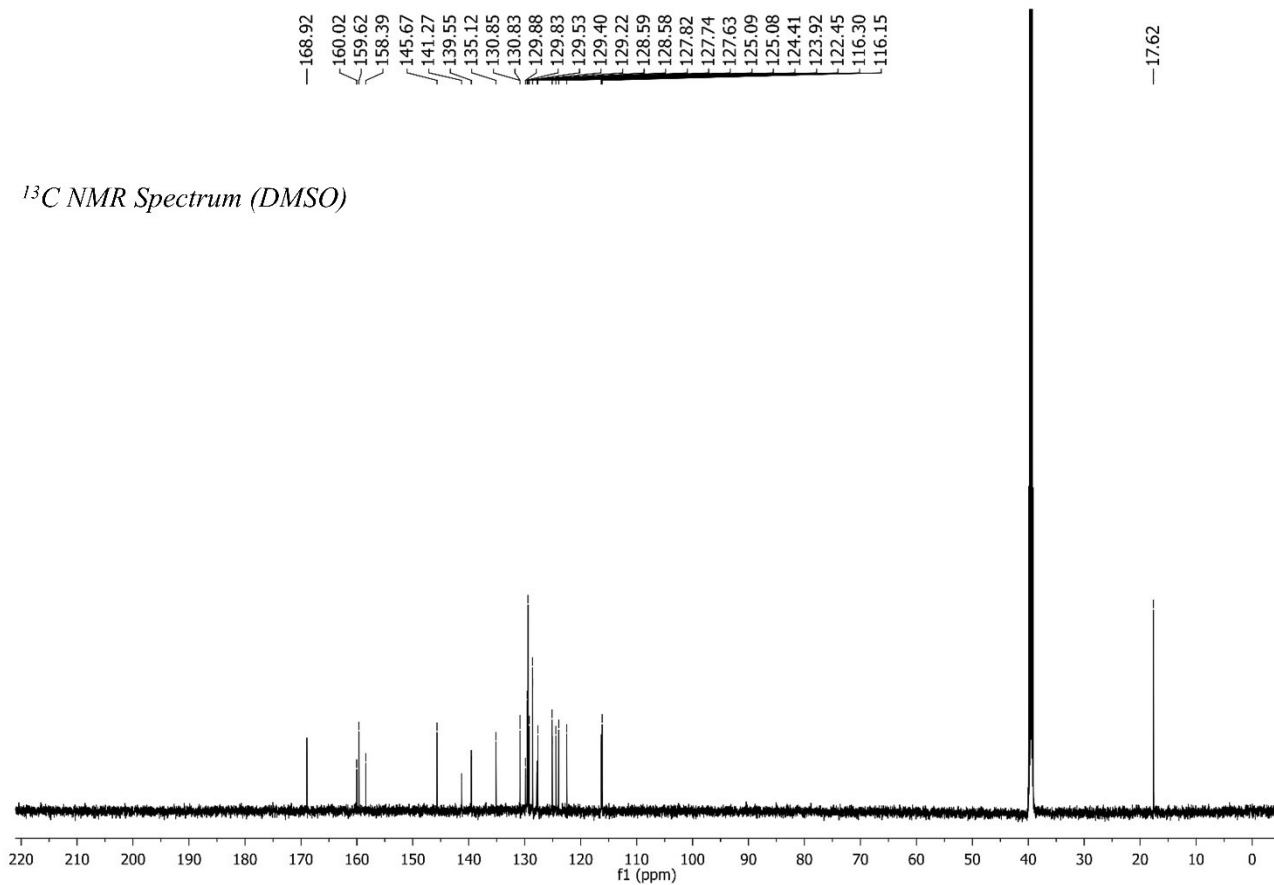

6-Fluoro-2-(2'-fluoro-[1,1'-biphenyl]-4-yl)-3-methylquinoline-4-carboxylic acid (**2b**)

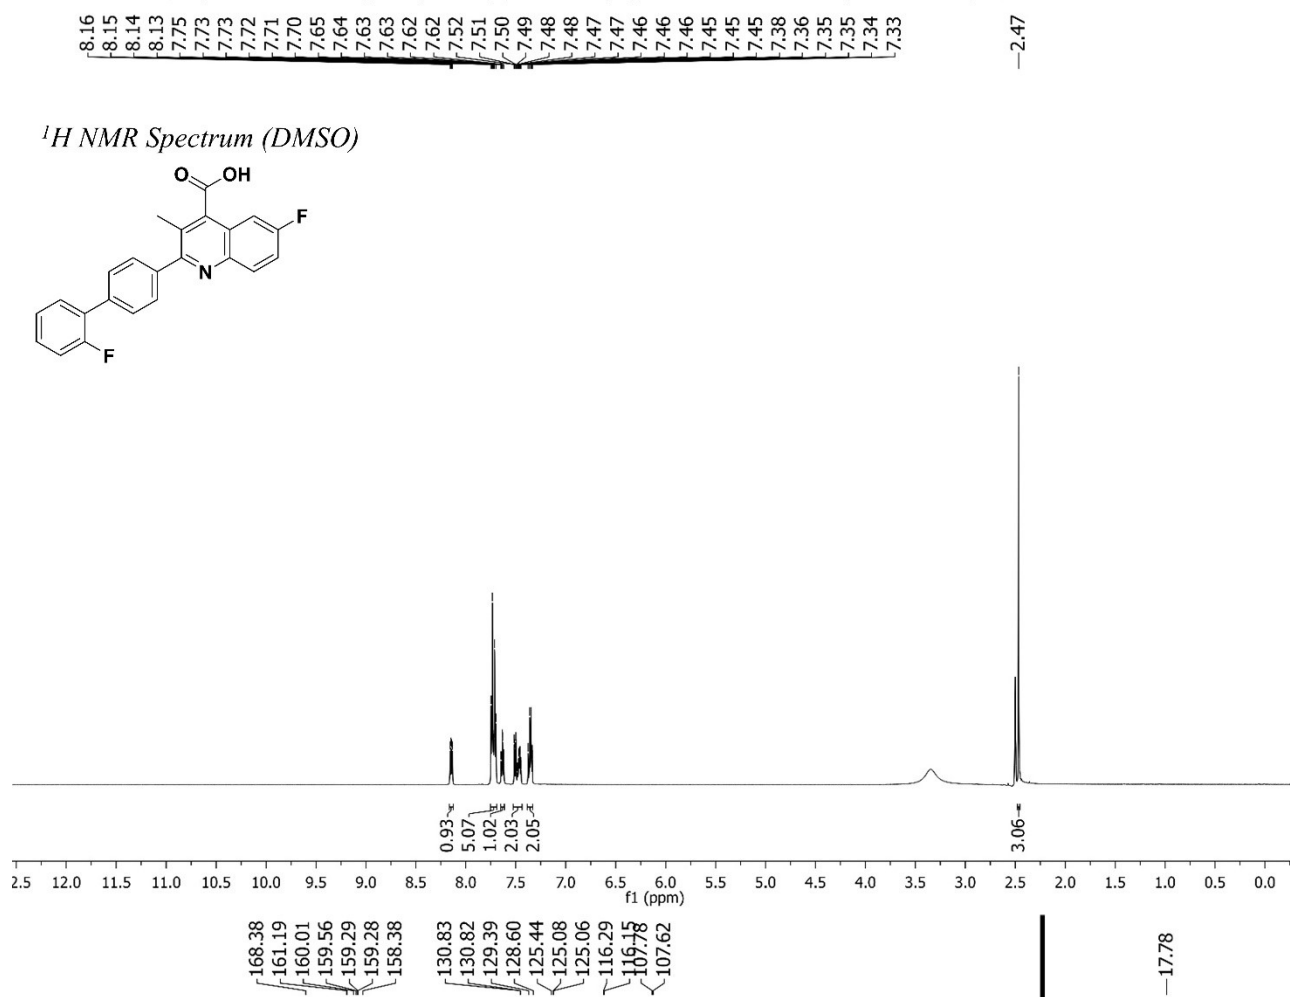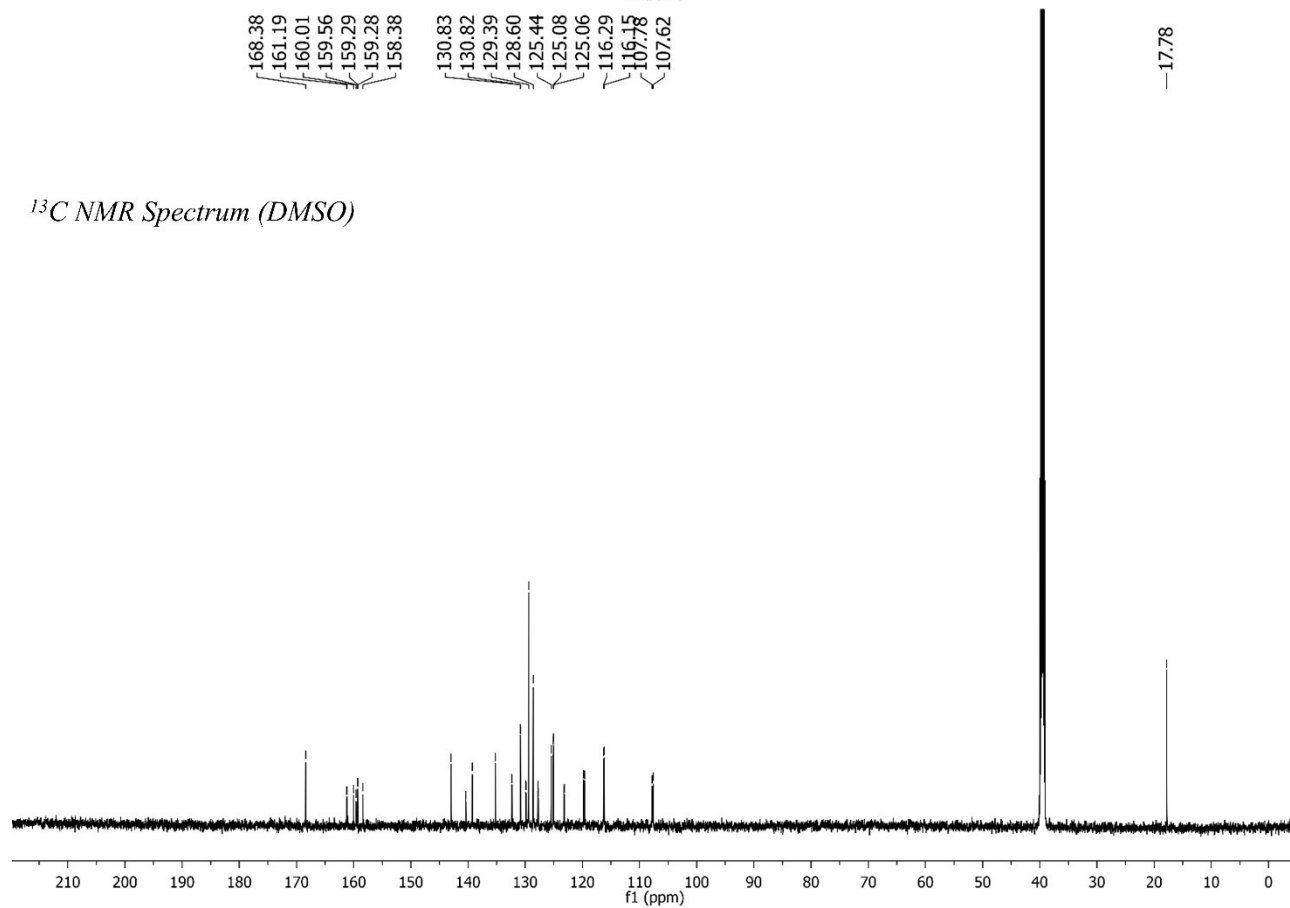

6-Bromo-2-(2'-fluoro-[1,1'-biphenyl]-4-yl)-3-methylquinoline-4-carboxylic acid (**2c**)

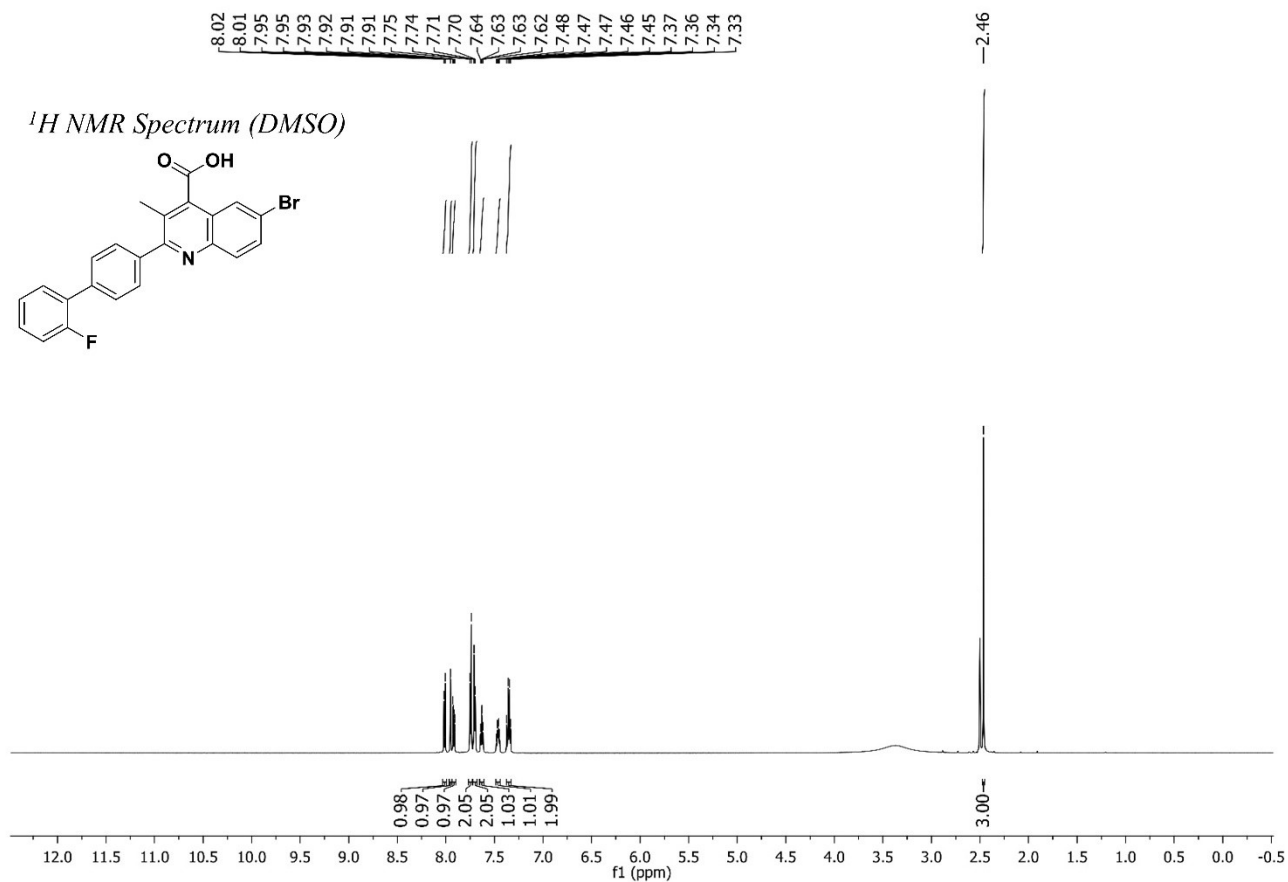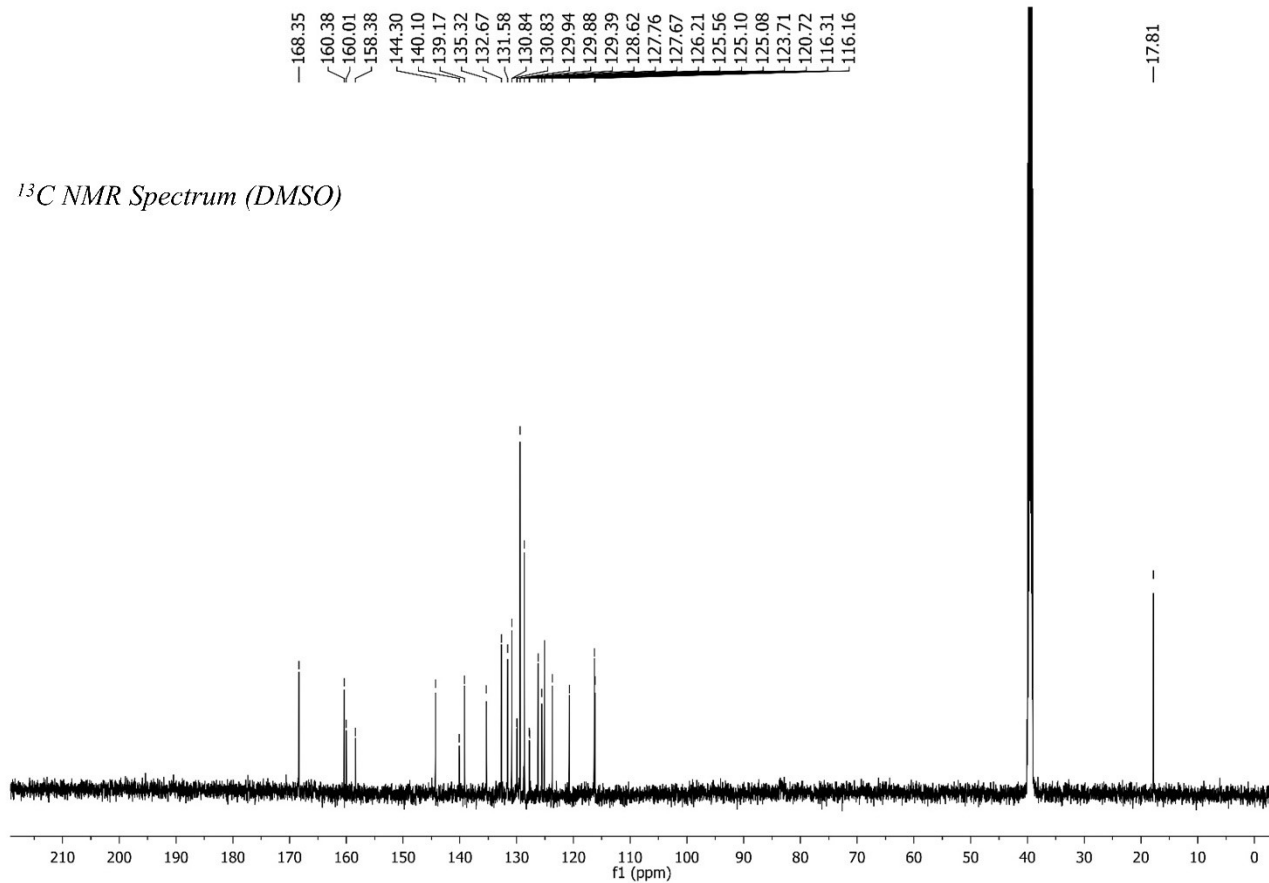



2-(2'-Fluoro-[1,1'-biphenyl]-4-yl)-6-iodo-3-methylquinoline-4-carboxylic acid (**2d**)

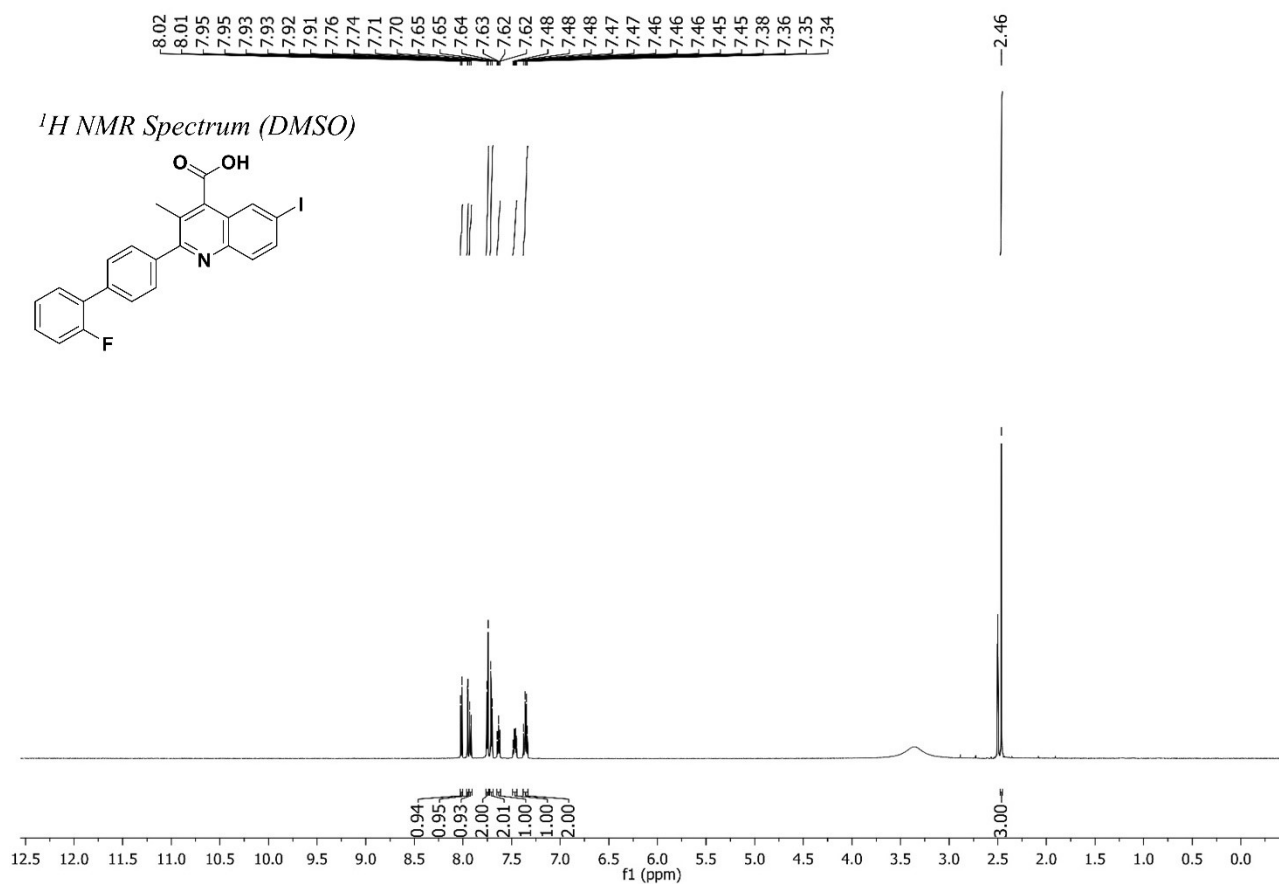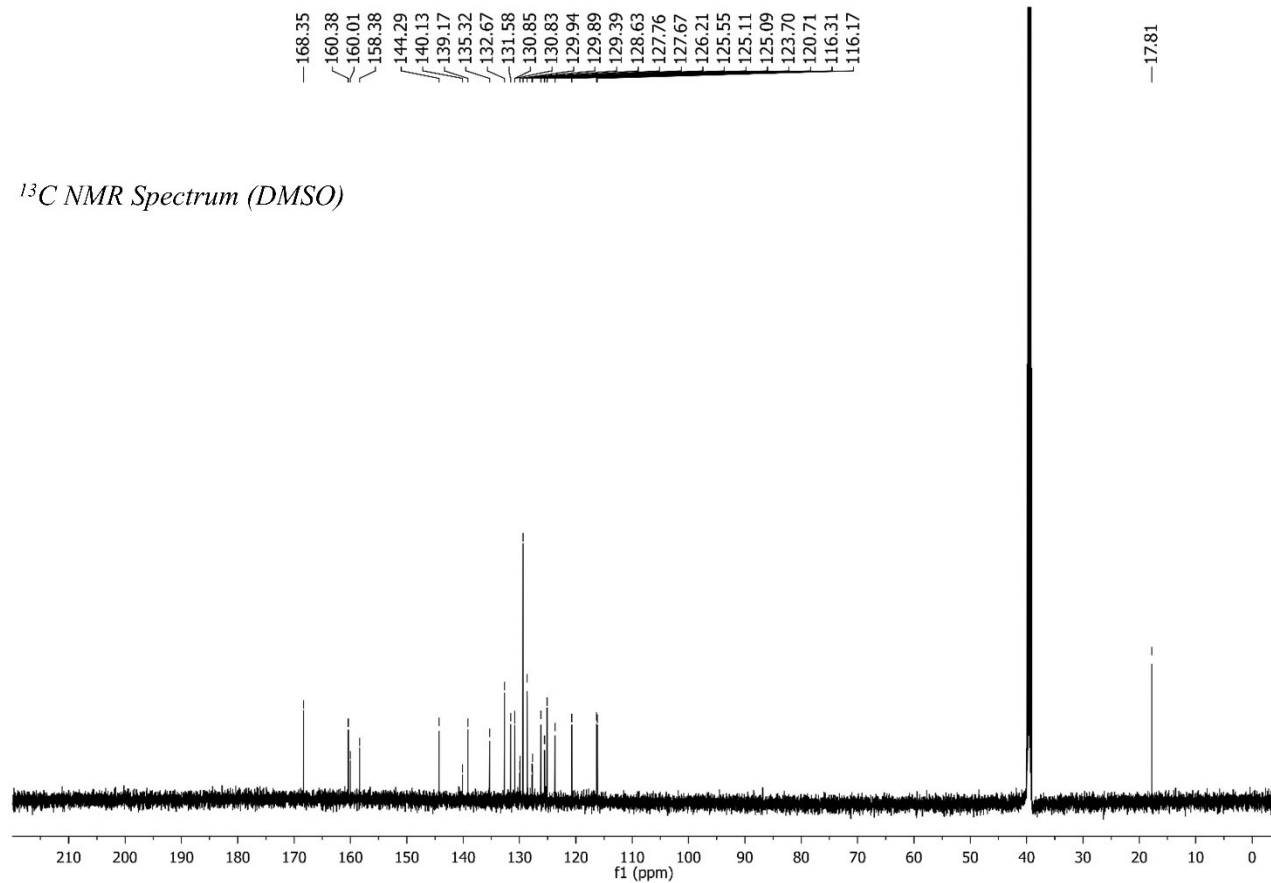

4-Nitrobenzyl 2-(2'-fluoro-[1,1'-biphenyl]-4-yl)-3-methylquinoline-4-carboxylate (**3a**)

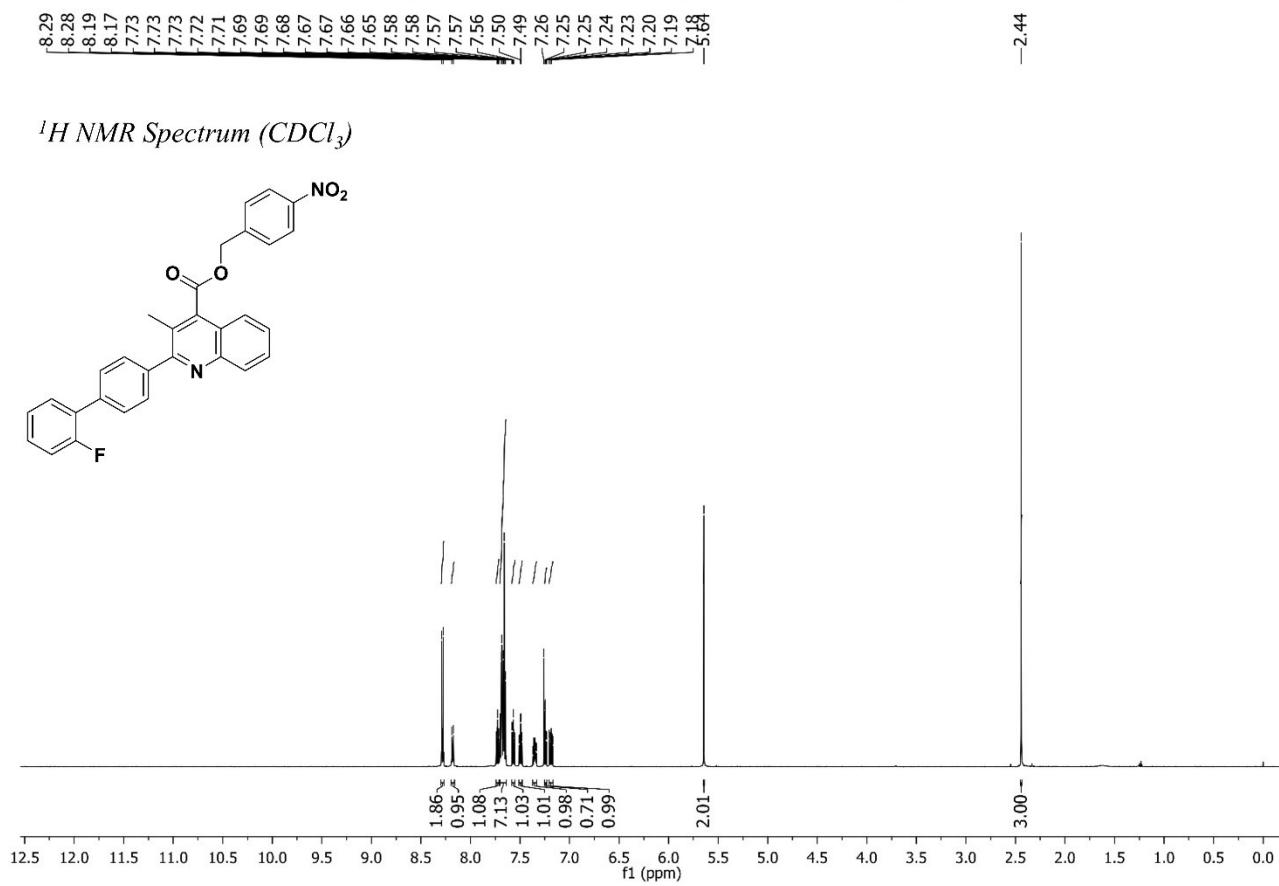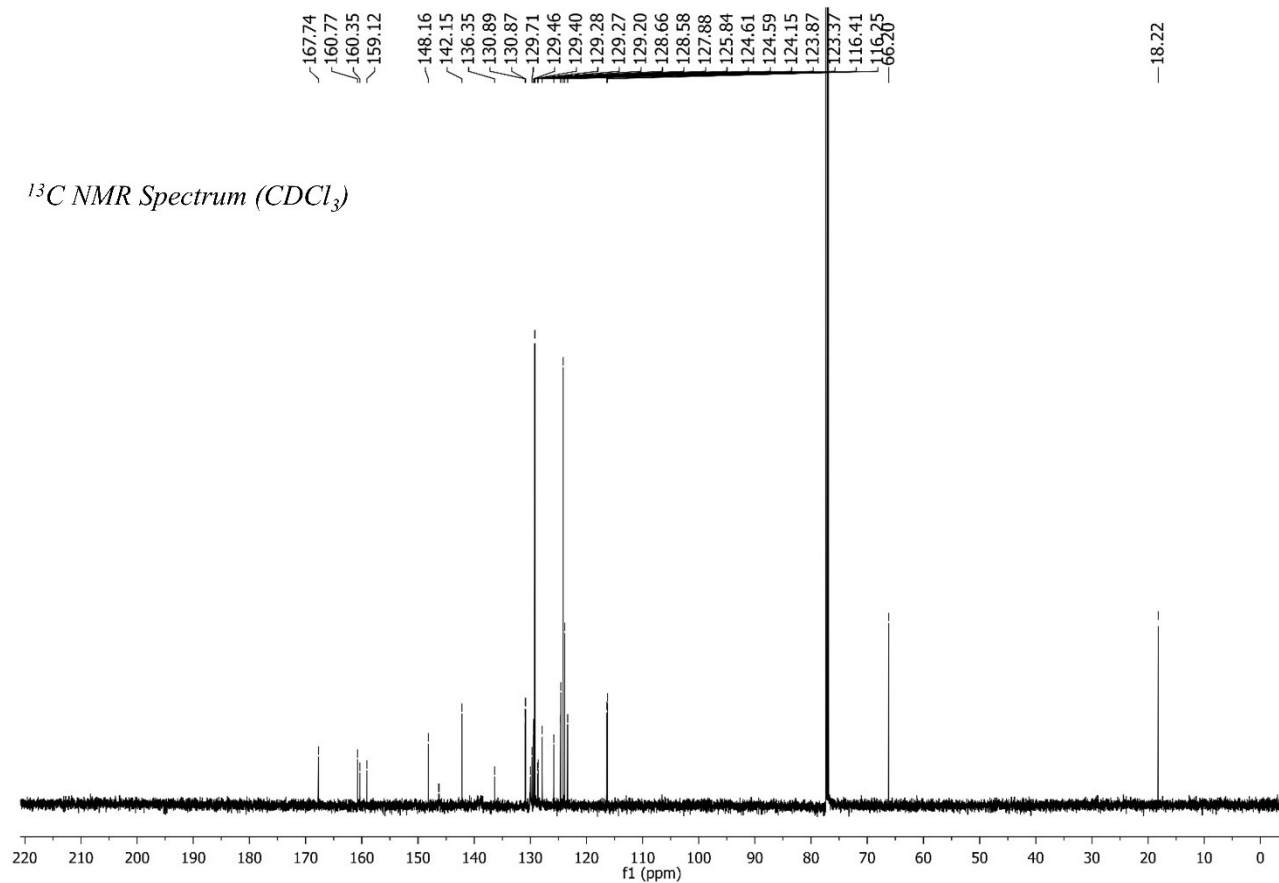

4-Nitrobenzyl-6-fluoro-2-(2'-fluoro-[1,1'-biphenyl]-4-yl)-3-methylquinoline-4-carboxylate (**3b**)

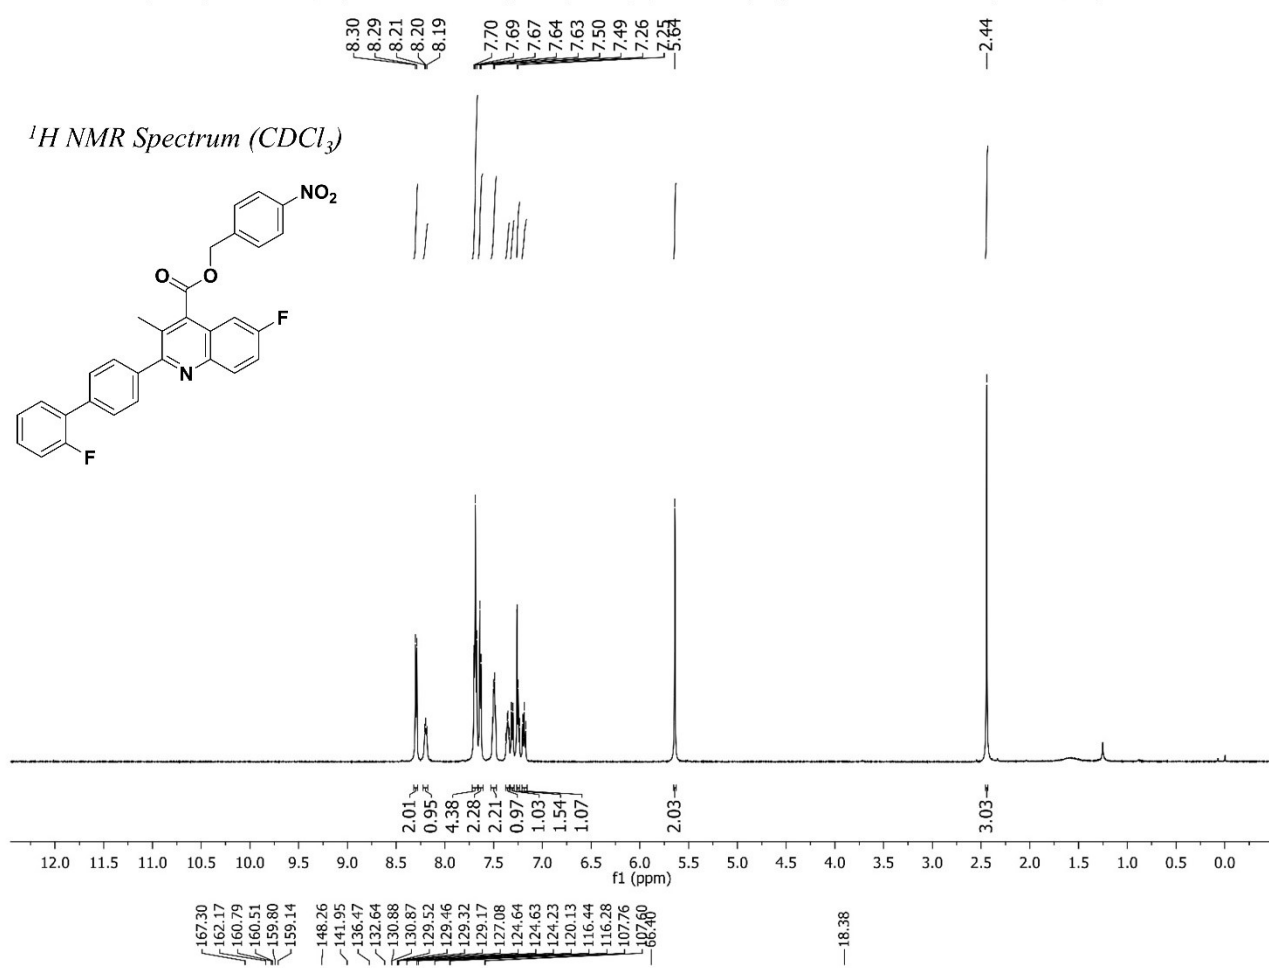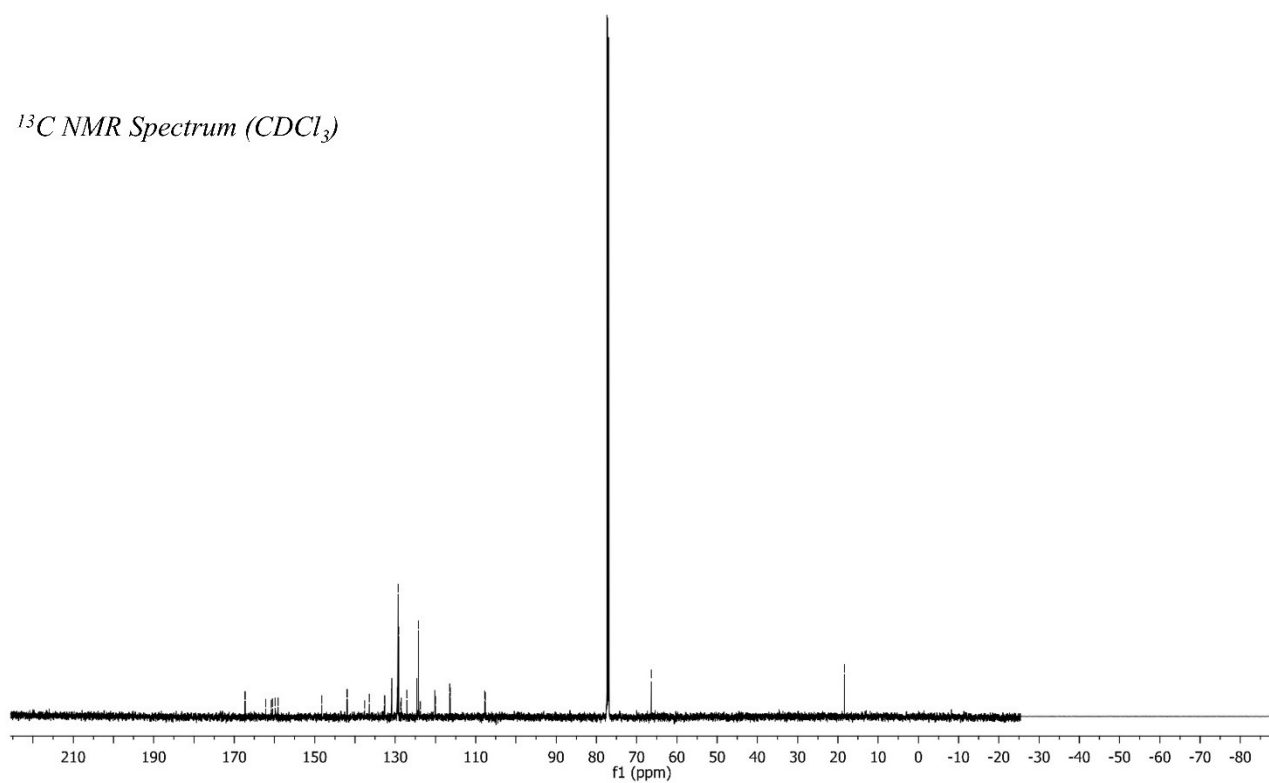

4-Nitrobenzyl-6-bromo-2-(2'-fluoro-[1,1'-biphenyl]-4-yl)-3-methylquinoline-4-carboxylate (**3c**)

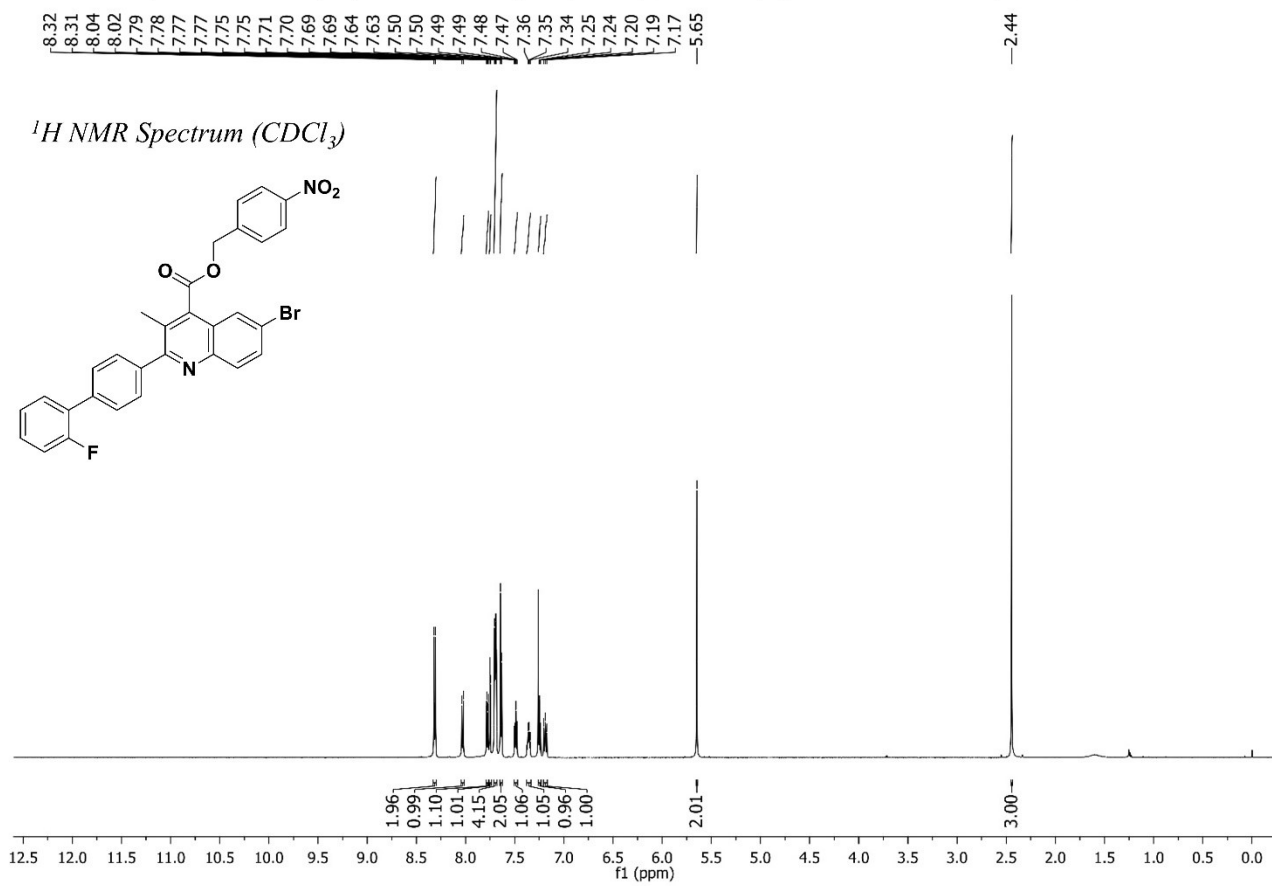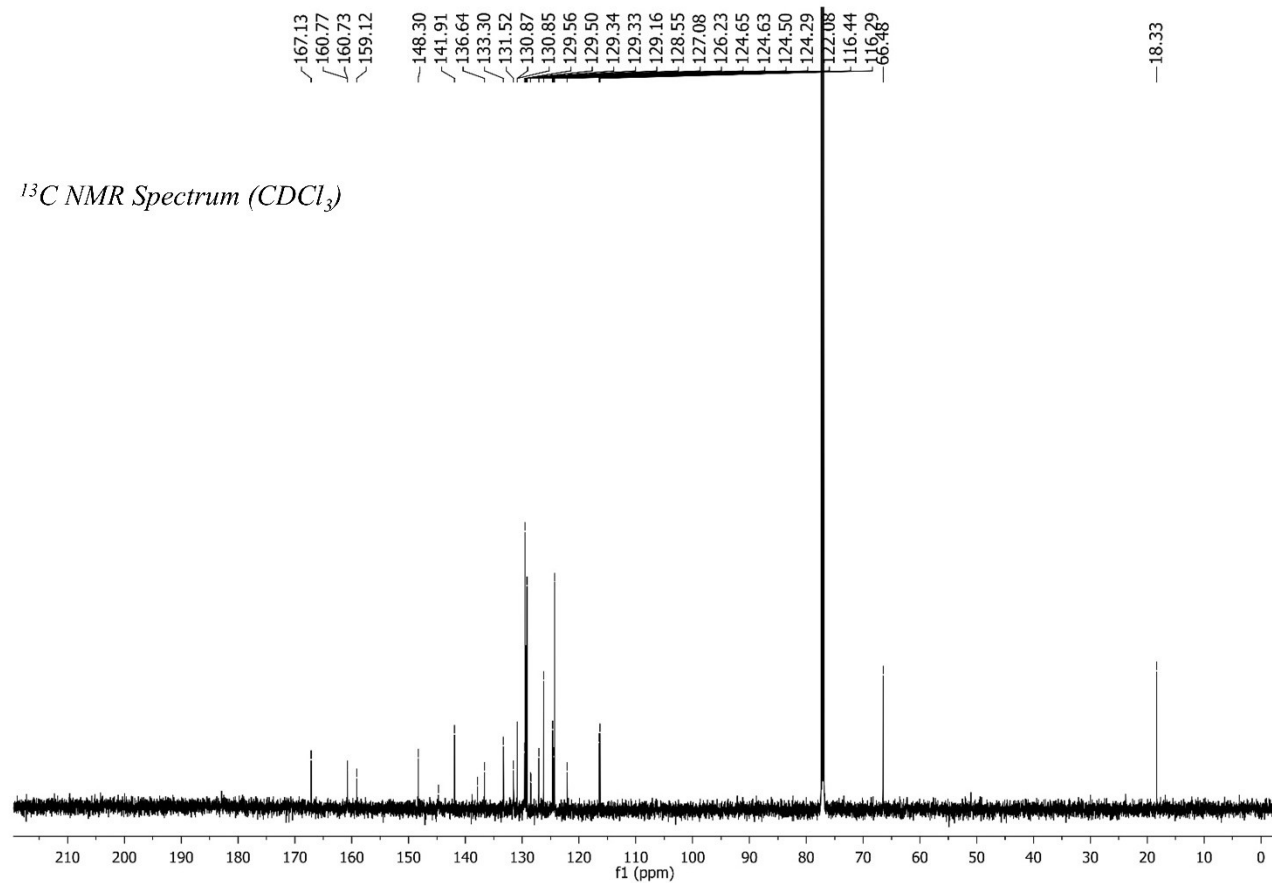

4-Nitrobenzyl-2-(2'-fluoro-[1,1'-biphenyl]-4-yl)-6-iodo-3-methylquinoline-4-carboxylate (**3d**)

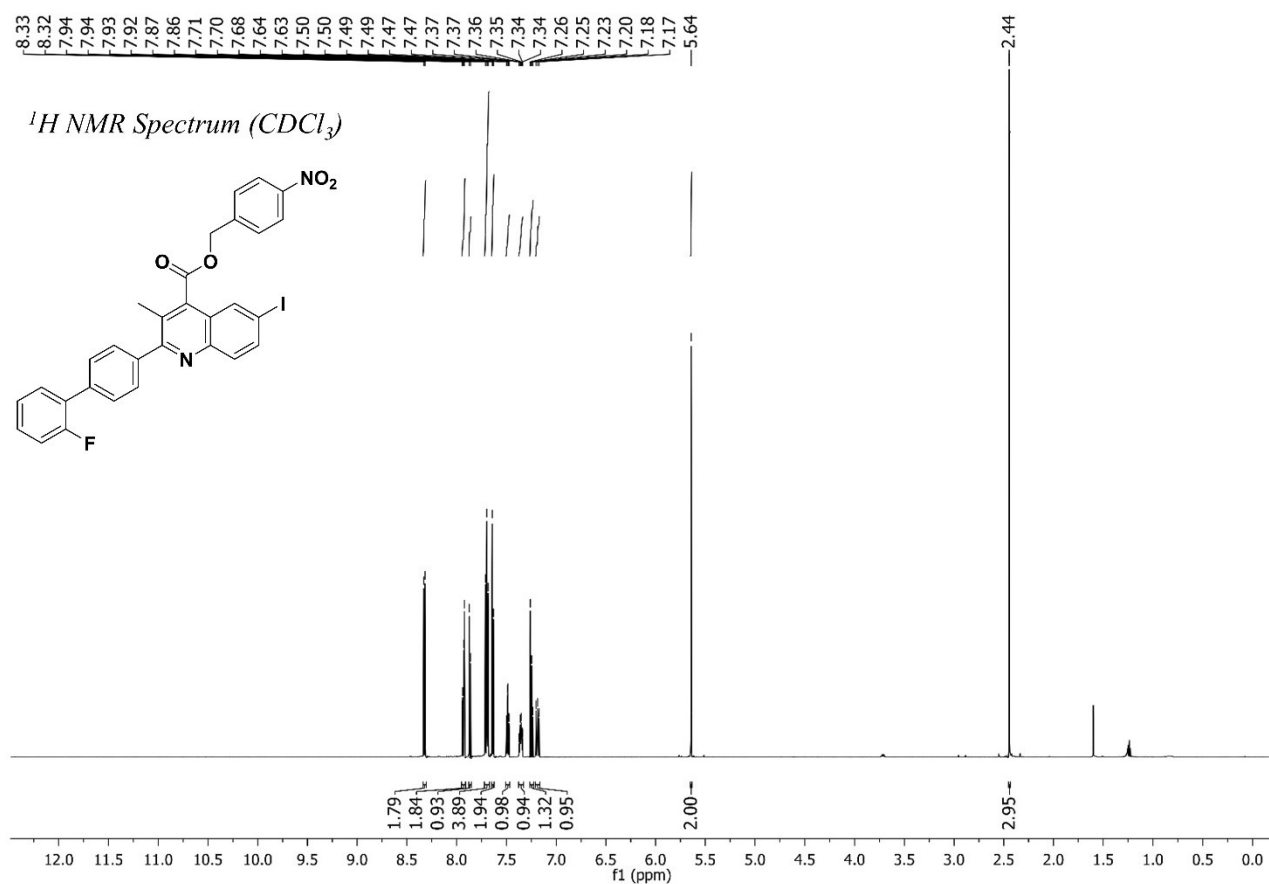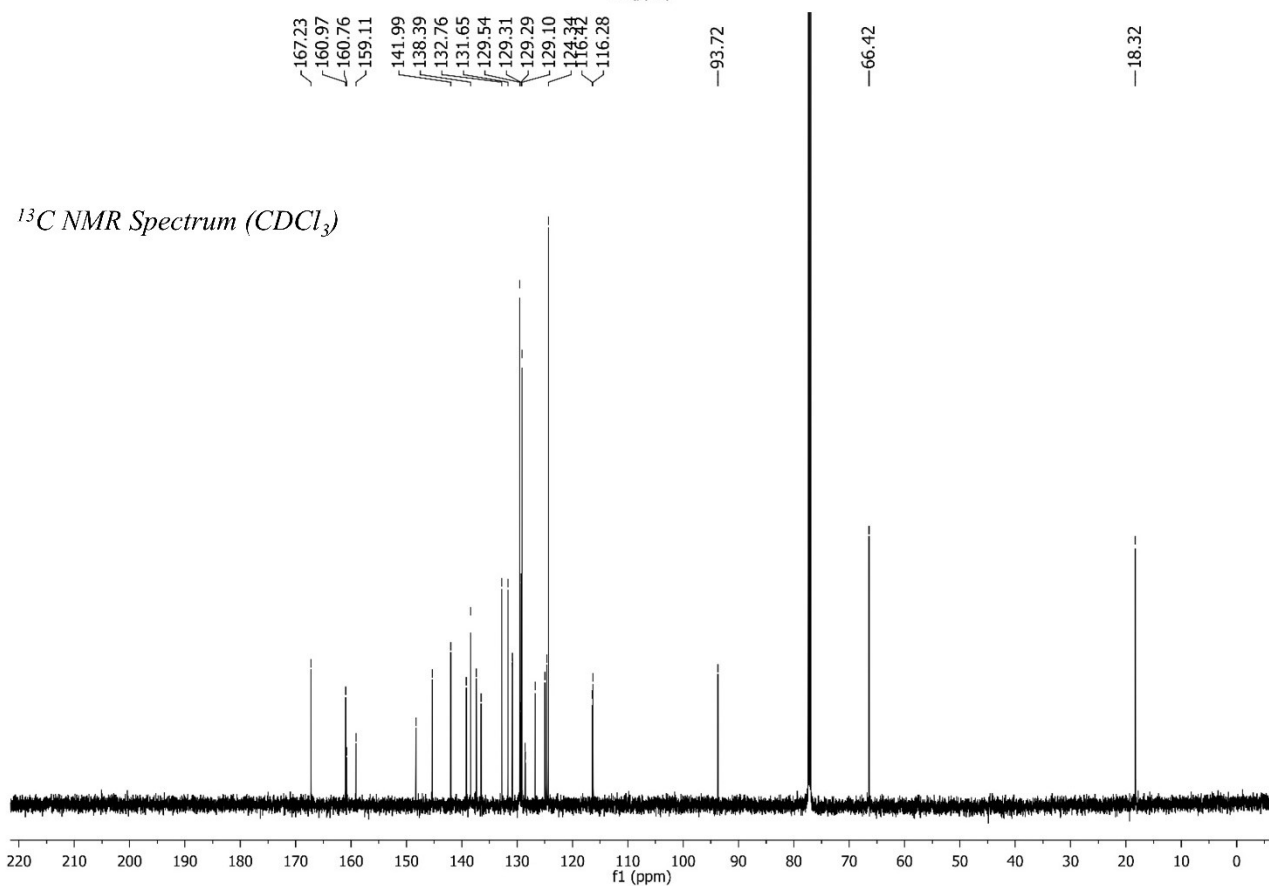

4-Nitrobenzyl-2-(2'-fluoro-[1,1'-biphenyl]-4-yl)-3-methyl-6-(4,4,5,5-tetramethyl-1,3,2-dioxaborolan-2-yl)quinoline-4-carboxylate (4)

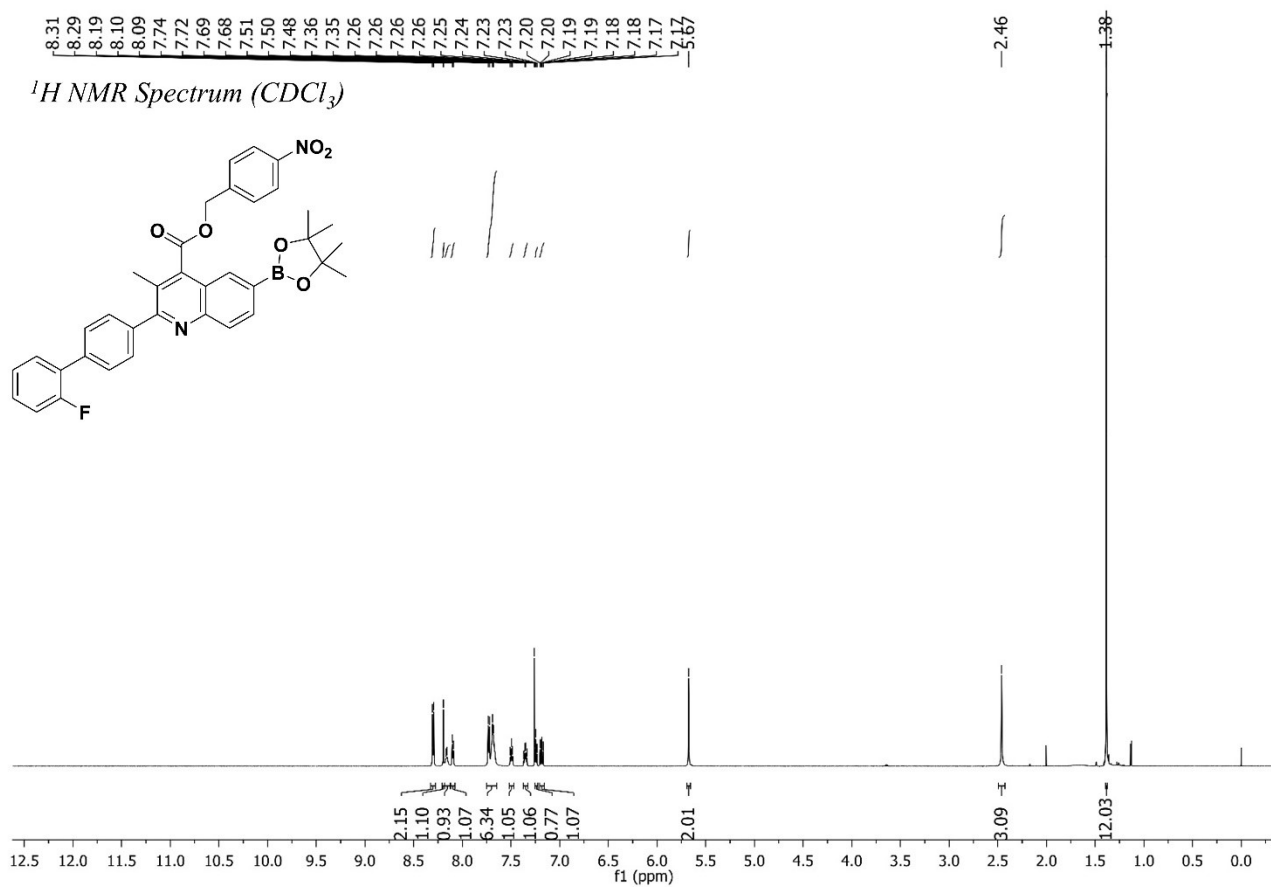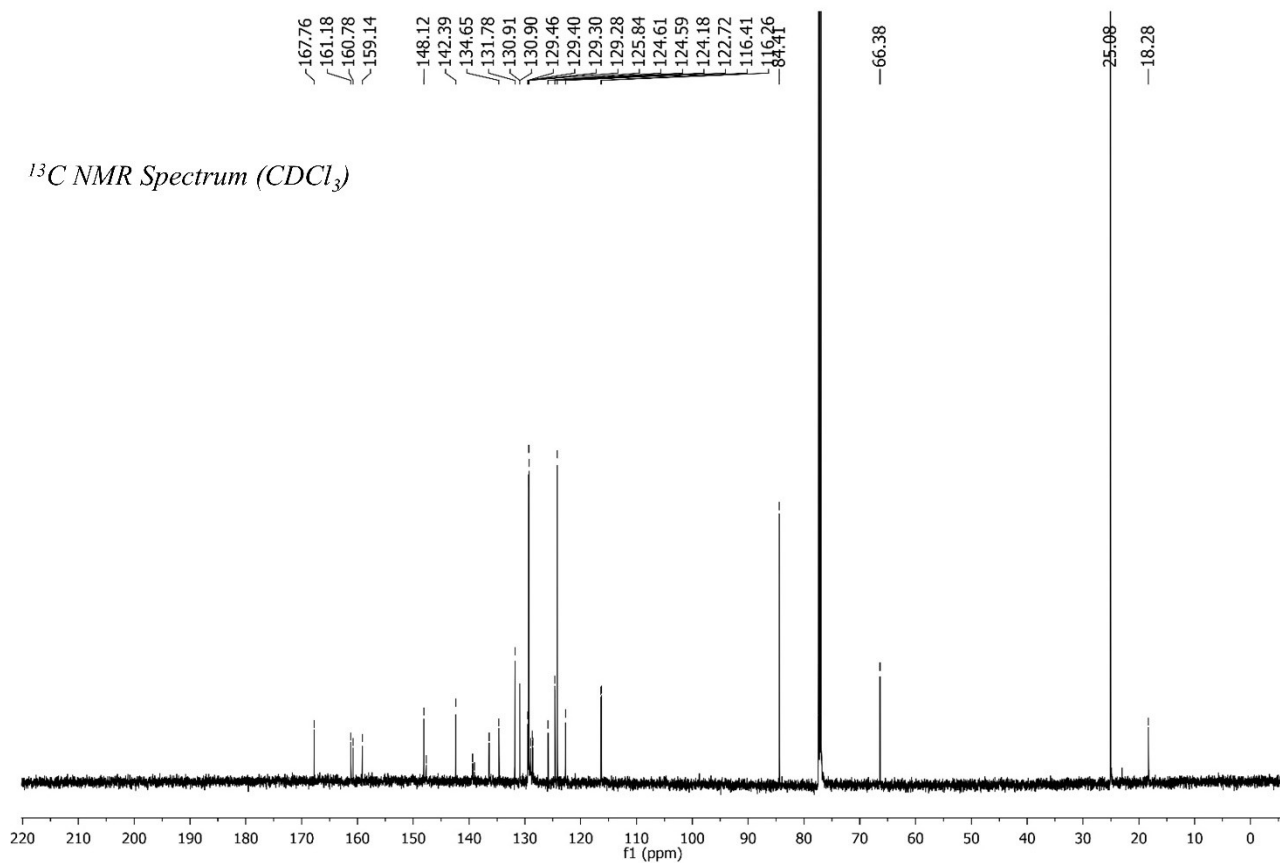

4-Nitrobenzyl2-(2'-fluoro-[1,1'-biphenyl]-4-yl)-3-methyl-6-(tributylstannyl)quinoline-4-carboxylate (**5**)

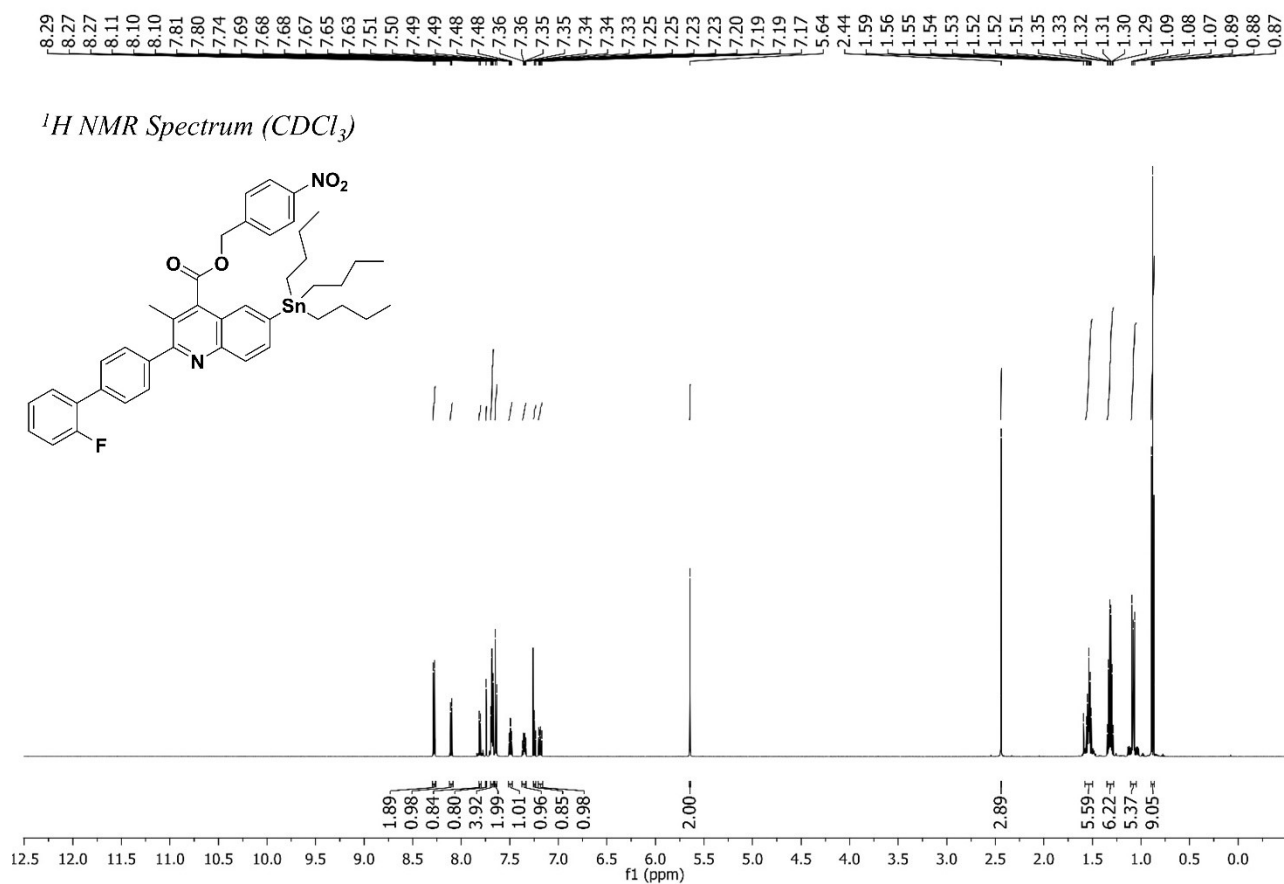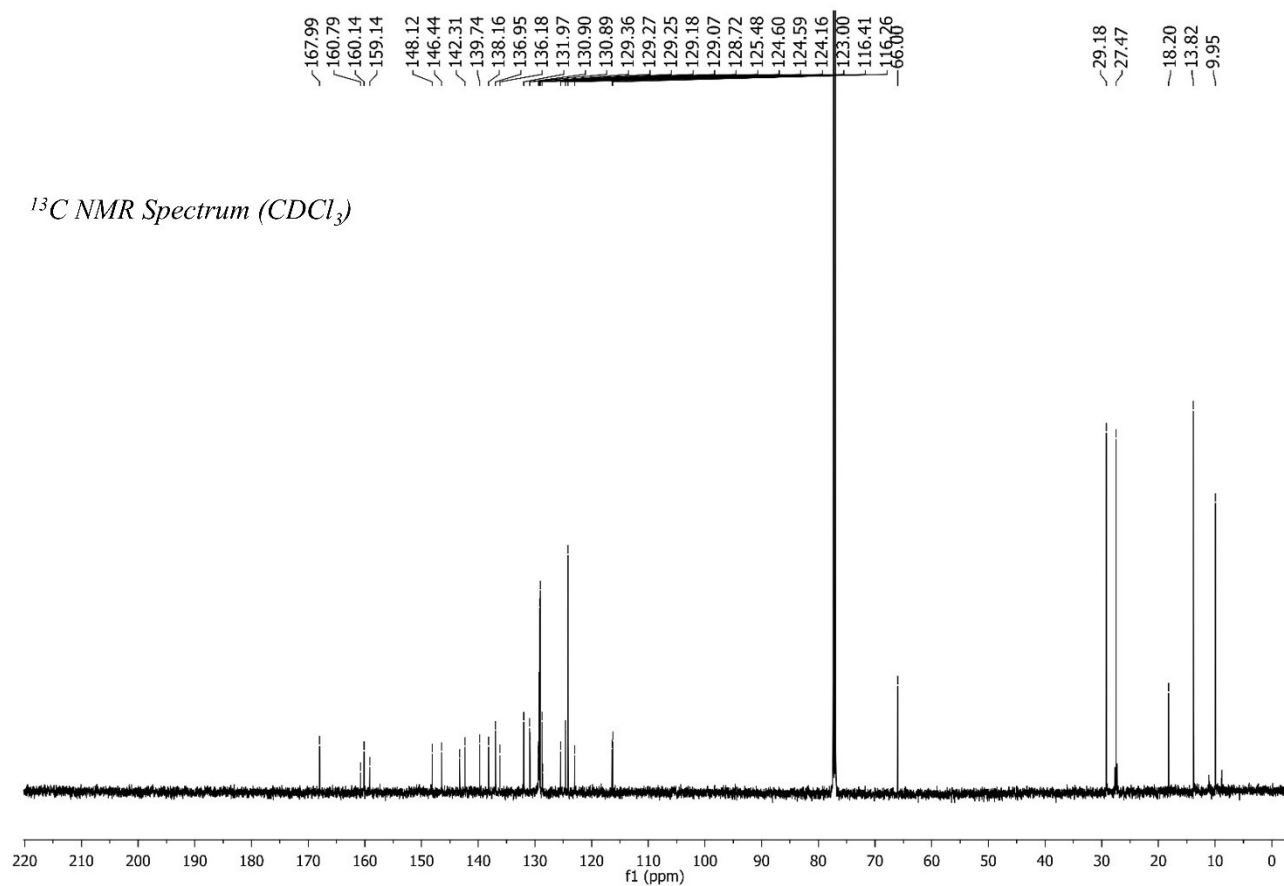

4-Nitrobenzyl-2-(2'-fluoro-[1,1'-biphenyl]-4-yl)-3-methyl-6-(4,4,5,5-tetramethyl-1,3,2-dioxaborolan-2-yl)quinoline-4-carboxylate (4)

## HPLC Analysis

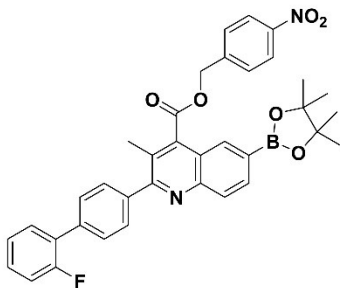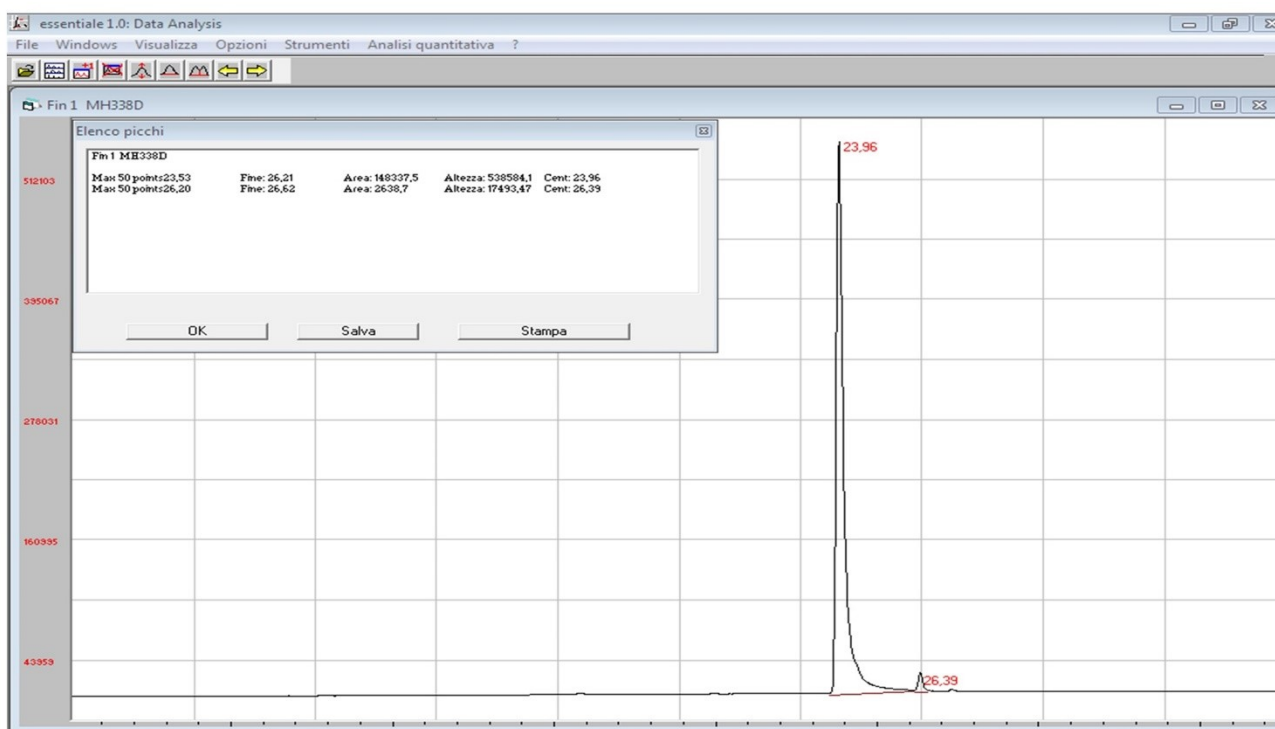



4-Nitrobenzyl 2-(2'-fluoro-[1,1'-biphenyl]-4-yl)-3-methyl-6-(tributylstannyl)quinoline-4-carboxylate (**5**)

## HPLC Analysis

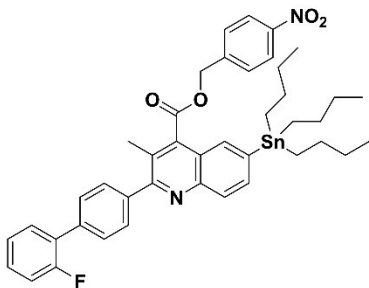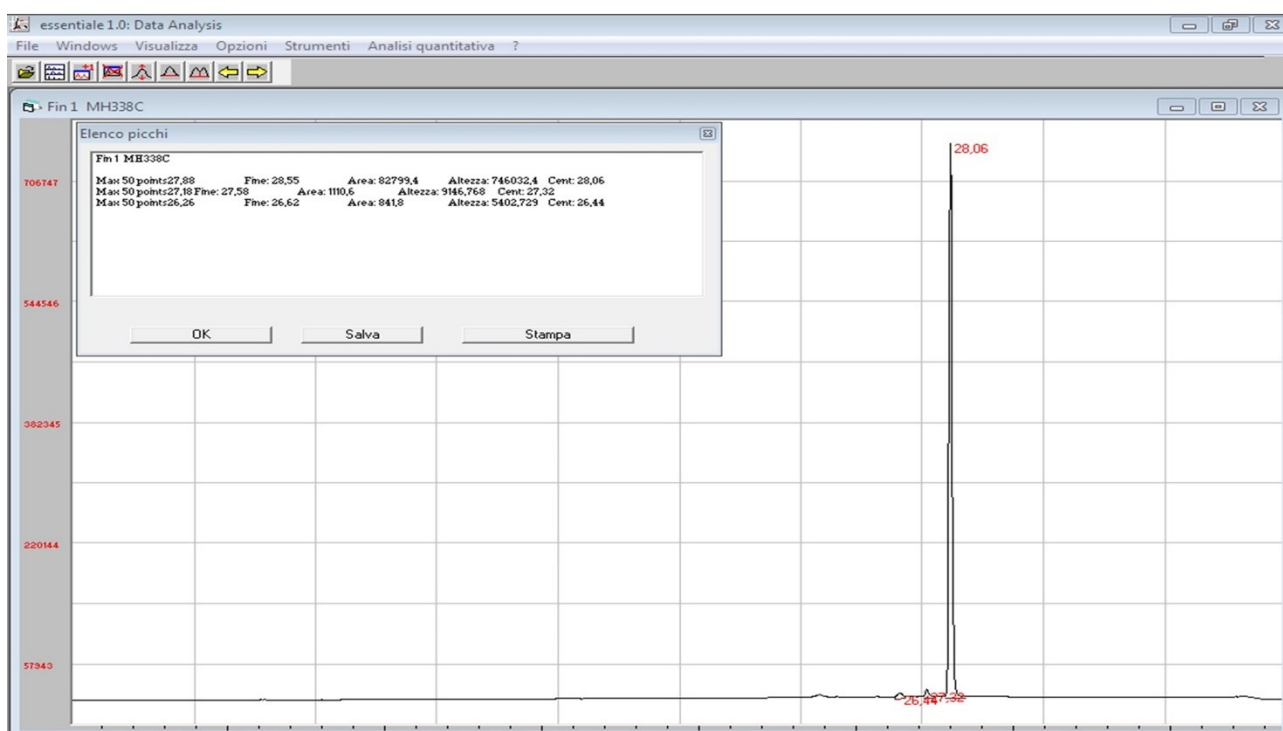

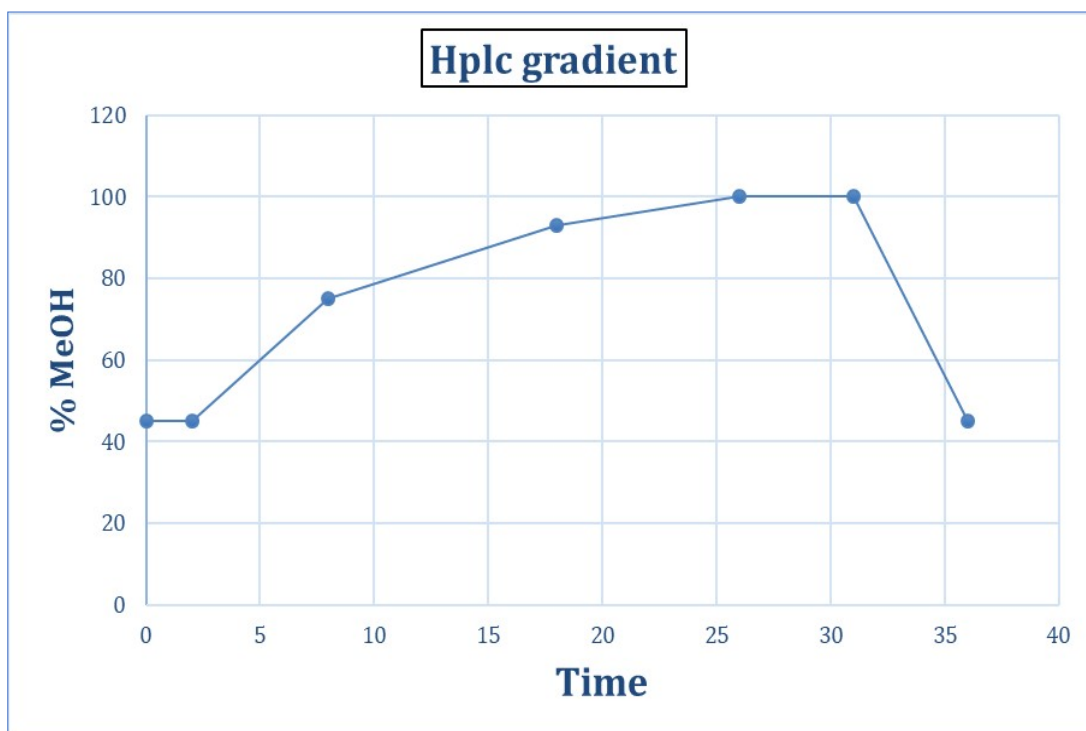

**Figure S1:** HPLC gradient method showing the percentage of MeOH + 0.1% trifluoroacetic acid (**B**) at various time points. LiChrosorb RP-18 column (250x4mm, 5 $\mu$ m particle size, Merck); Mobile phase gradient method: **A** (aqueous DW + 0.1% trifluoroacetic acid); **B** (MeOH + 0.1% trifluoroacetic acid); 0-2 min (isocratic 45% **B**), 2.0-8.0 min (45  $\rightarrow$  75% **B**), 8.0-18.0 min (75  $\rightarrow$  93% **B**), 18-26 min (93  $\rightarrow$  100% **B**), 26.0-31.0 min (100% **B**), 10 (isocratic 100% **B**), 31.0-36.0 min (100  $\rightarrow$  45% **B**), 36.0 min (Stop); 1.5 mL/min; UV 254 nm.

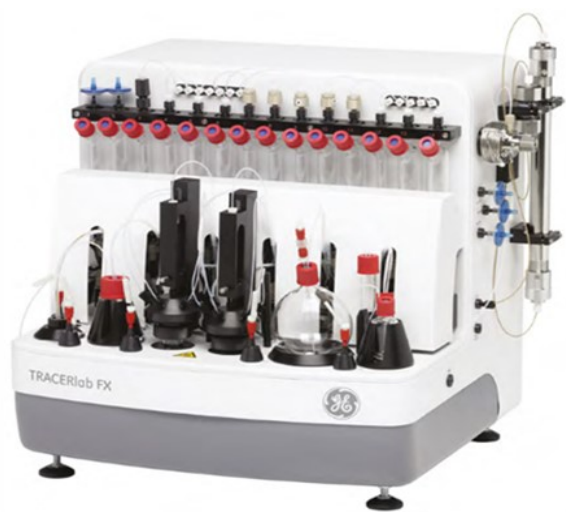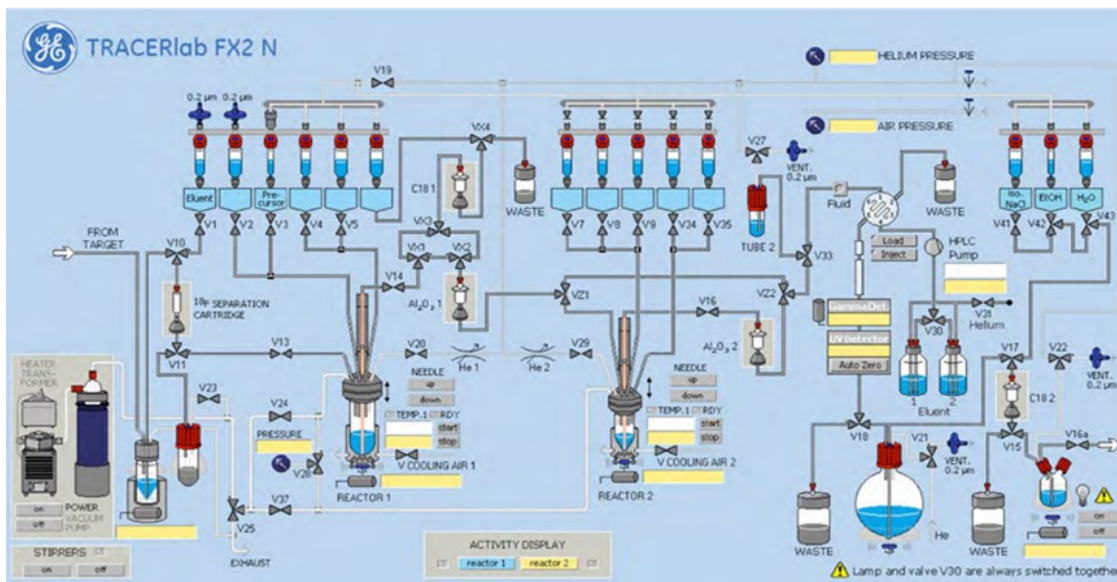

**Figure S2.** GE Healthcare Tracerlab FX2N (second generation) auto-module instrument design and software flow diagram.

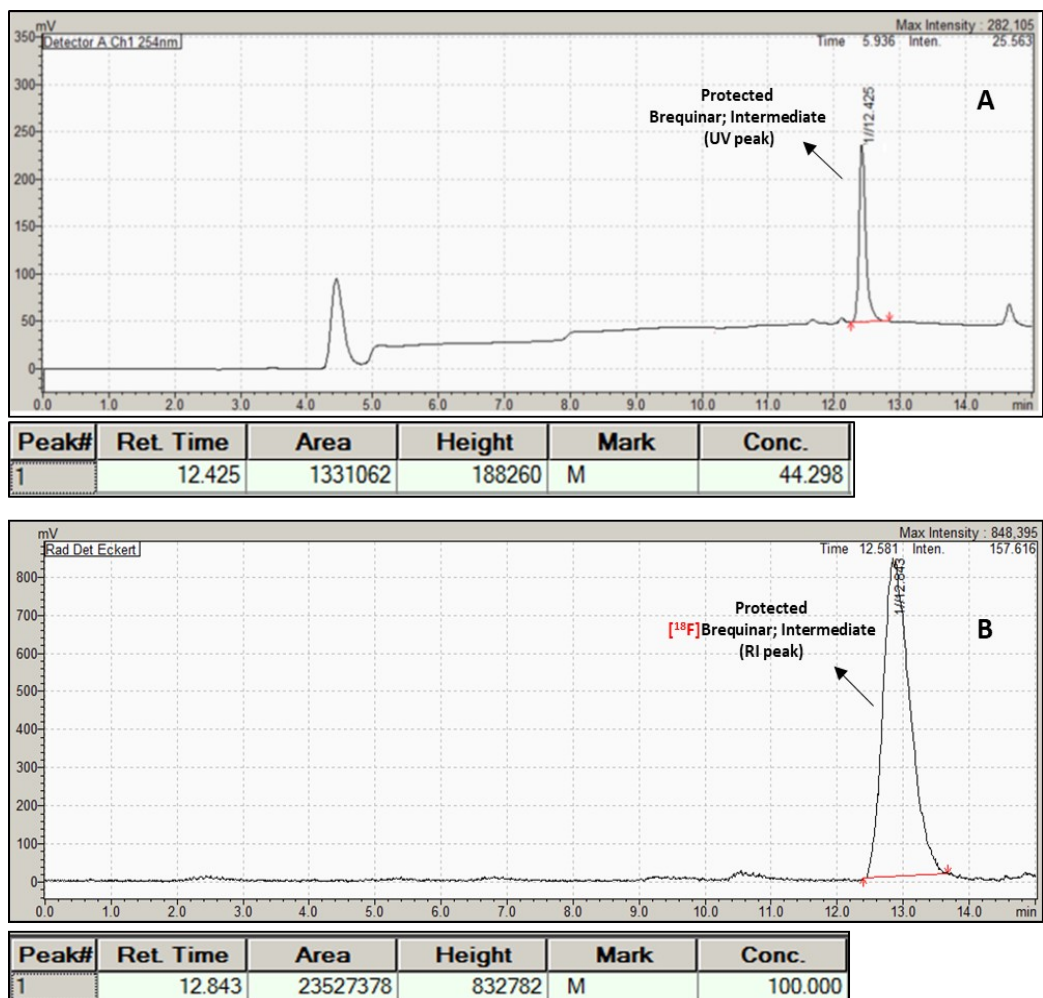

**Figure S3.** Analytical QC HPLC (analysis was performed using the gradient method) chromatogram of protected [ $^{18}\text{F}$ ]brequinar (intermediate). UV peak (A); RI Peak (B)

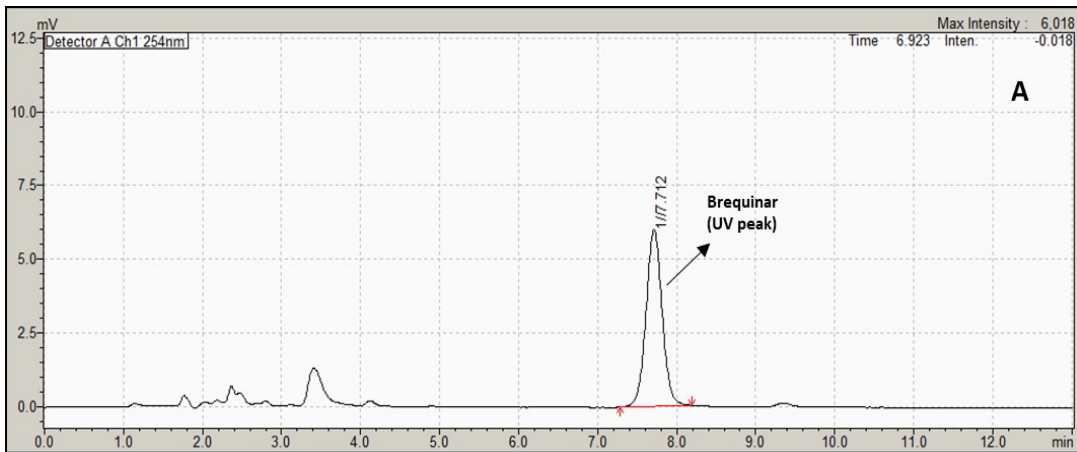

| Peak# | Ret. Time | Area  | Height | Mark | Conc.   |
|-------|-----------|-------|--------|------|---------|
| 1     | 7.712     | 84767 | 5991   | M    | 100.000 |

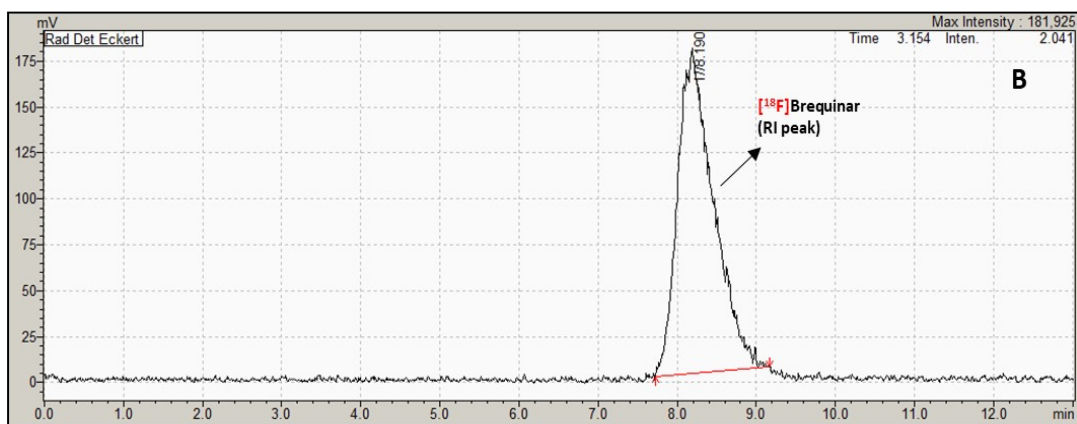

| Peak# | Ret. Time | Area    | Height | Mark | Conc.   |
|-------|-----------|---------|--------|------|---------|
| 1     | 8.190     | 5563630 | 176810 | M    | 100.000 |

**Figure S4:** Analytical QC HPLC (analysis was performed using the isocratic method) chromatogram of [<sup>18</sup>F]brequinar. UV peak (A); RI Peak (B)

**Figure S5:** PET/CT dynamic images\_video.pptx

**Table S1.** Preparation of reagents for the GE Tracerlab FX2N synthesis module

| Entry | Positions                | Reagents or materials                                                                                       | Quantities                           |
|-------|--------------------------|-------------------------------------------------------------------------------------------------------------|--------------------------------------|
| 1     | Vial V1                  | K222 in ACN + K <sub>2</sub> CO <sub>3</sub> in H <sub>2</sub> O                                            | 4 mg in 900 μL + 0.7 mg<br>in 100 μL |
| 2     | Vial V2                  | Cu(OTf) <sub>2</sub> (py) <sub>4</sub> in anhydrous ACN                                                     | 0.3 mL                               |
| 3     | Vial V3                  | Precursor in ACN                                                                                            | 3.9 mg in 0.3 mL                     |
| 4     | Vial V4, V5              | ACN solvent (3 times rinse)                                                                                 | 1.5 mL                               |
| 5     | Vial V8                  | ACN + DW + 8N NaOH                                                                                          | 0.2 mL + 0.4 mL + 0.2 mL             |
| 6     | Vial V9                  | 3 N HCL                                                                                                     | 0.545 mL                             |
| 7     | Vial V34                 | DW                                                                                                          | 0.454 mL                             |
| 8     | RBF (Collection<br>bulb) | DW                                                                                                          | 30 mL                                |
| 9     | Vail 43                  | DW                                                                                                          | 10 mL                                |
| 10    | Vail 42                  | Ethanol                                                                                                     | 0.5 mL                               |
| 11    | Vail 41                  | Saline                                                                                                      | 4.5 mL                               |
| 12    | V16                      | Connect product vial including 0.22 μm GS<br>sterile filter and venting needle                              | 1                                    |
| 13    | V10-V11<br>cartridge     | Sep-Pak QMA light<br>Preconditioned with 1M K <sub>2</sub> CO <sub>3</sub> (5mL)<br>followed by water (5mL) | 1                                    |
| 11    | V15-V17                  | Sep-Pak C-18 Plus<br>Preconditioned with Ethanol (5mL)<br>followed by water (5mL)                           | 1                                    |
| 12    |                          | Sep-Pak Silica plus Long Cartridge 690 mg<br>Preconditioned with Acetonitrile (9mL)                         | 1                                    |
