# Supplementary figures and images for: Radiosynthesis of [ 18 F]brequinar for in vivo PET imaging of hDHODH for potential studies of acute myeloid leukemia and cancers
Source: Royal Society of Chemistry journal article supplement (doi:10.1039/d4md00433g), 2024-01-01

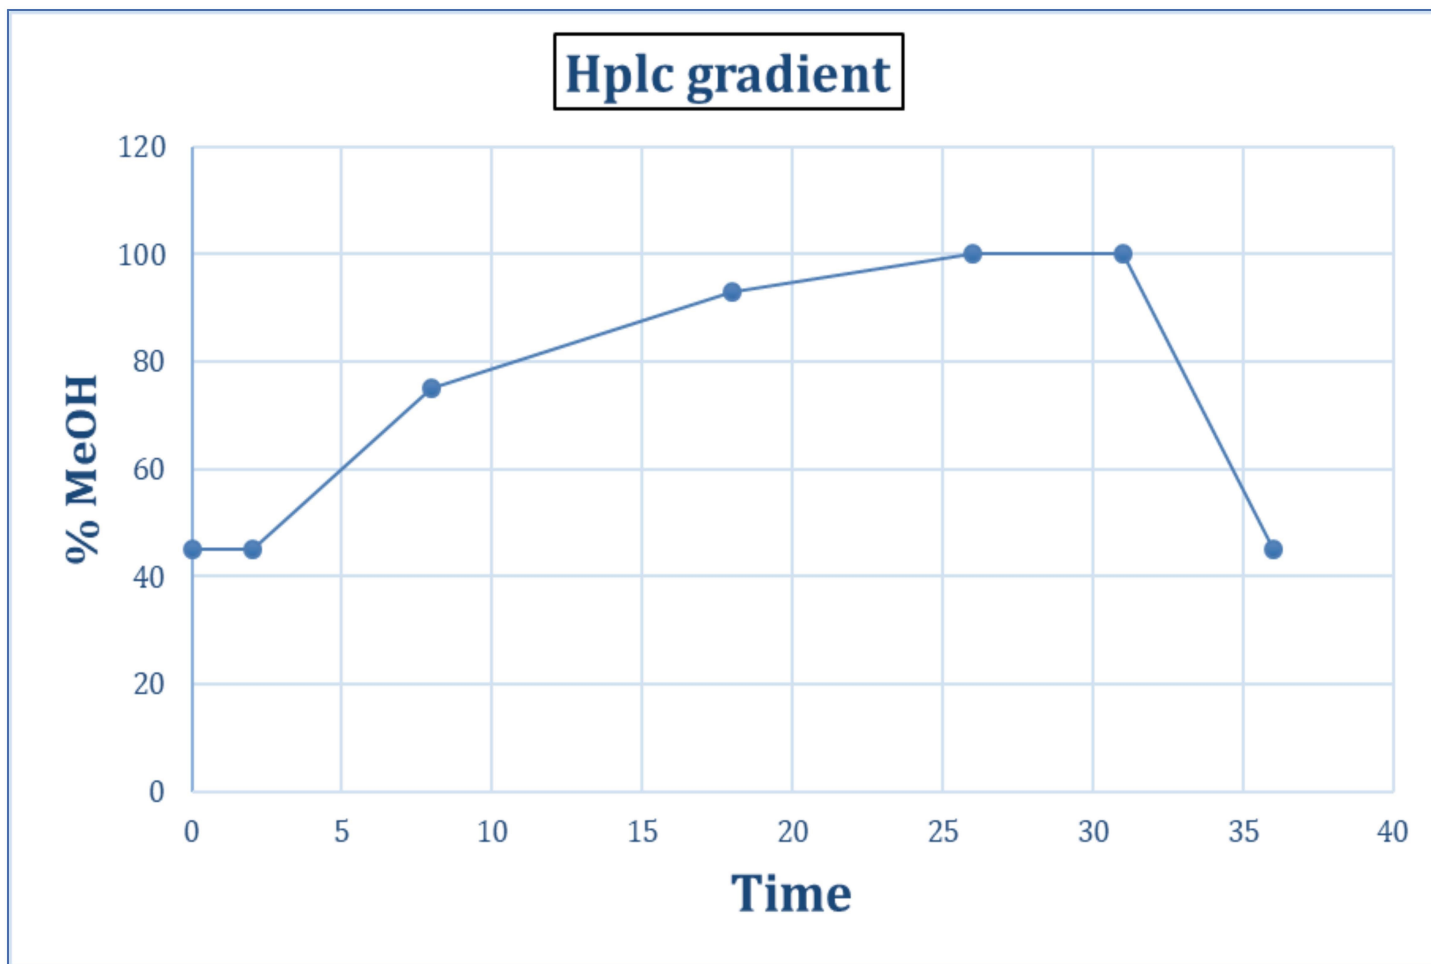

Supplement: d4md00433g2.pdf [file d4md00433g2.pdf]

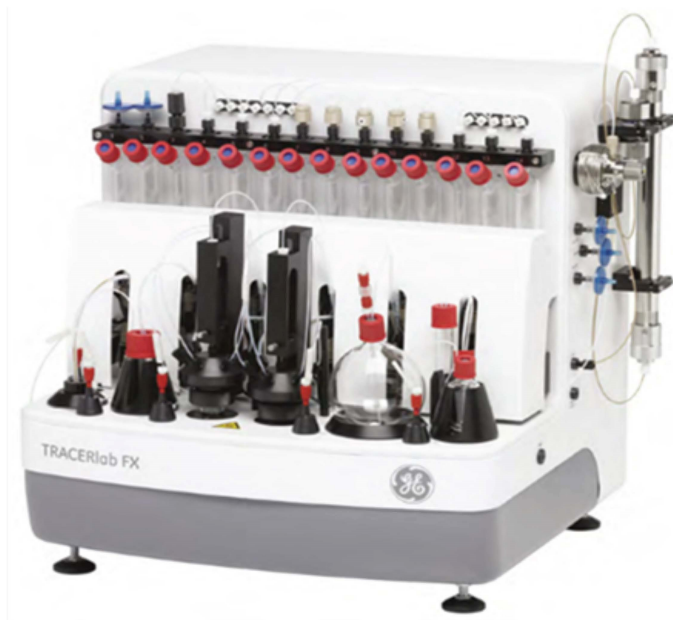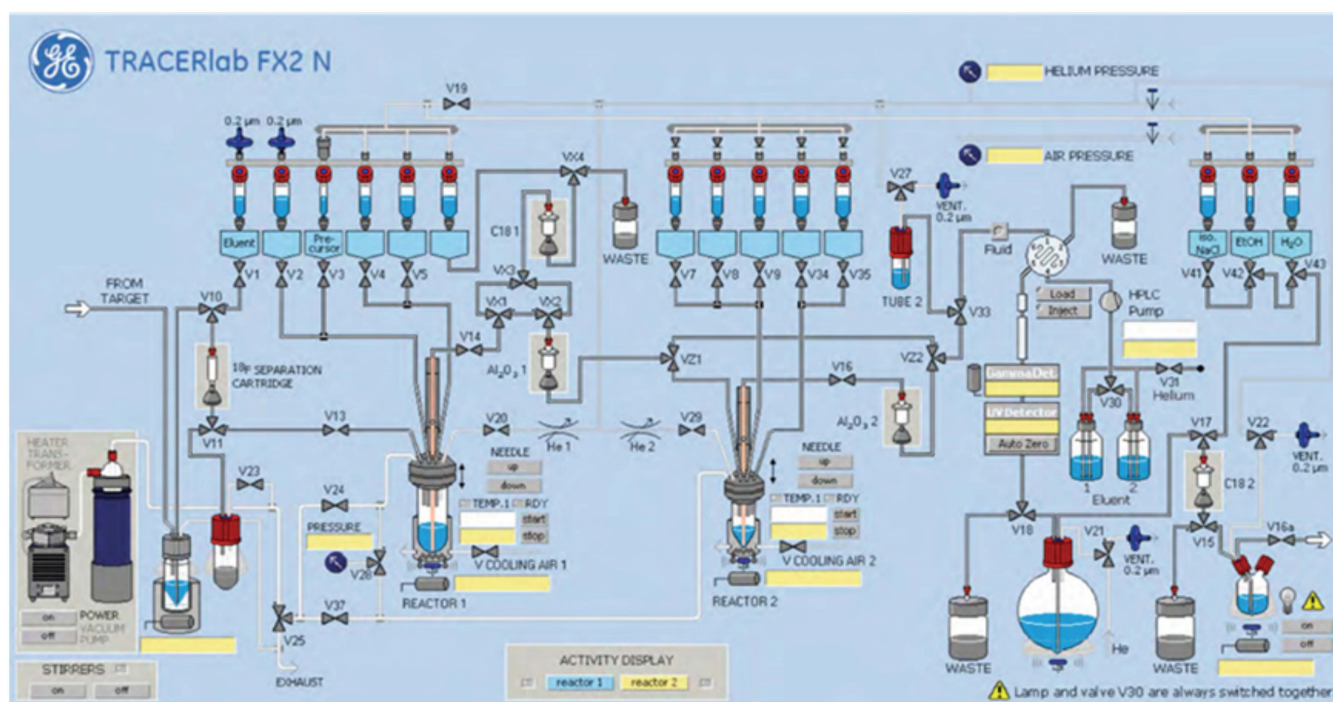

Supplement: d4md00433g3.pdf [file d4md00433g3.pdf]

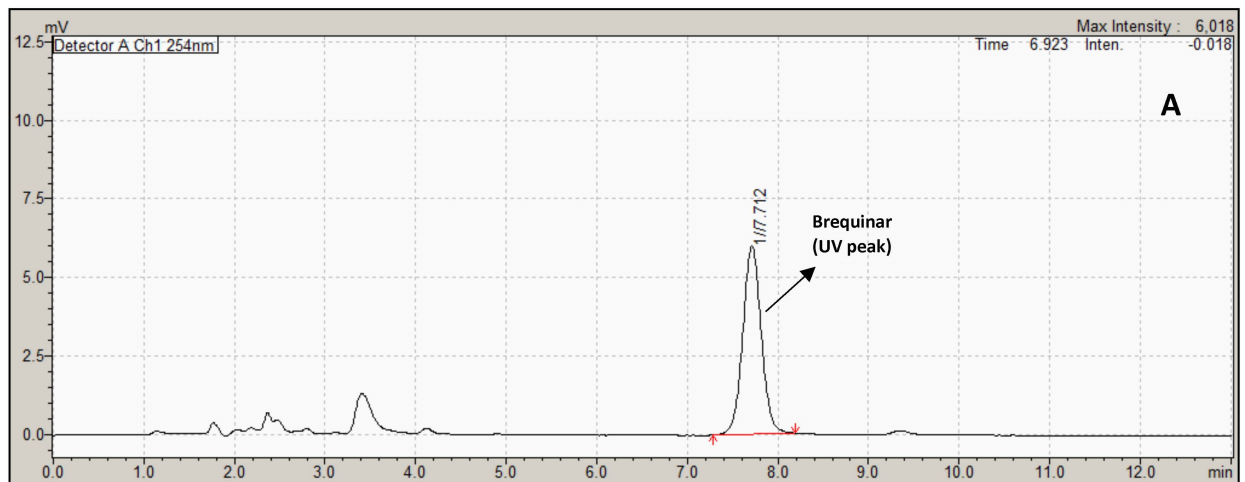

| Peak# | Ret. Time | Area  | Height | Mark | Conc.   |
|-------|-----------|-------|--------|------|---------|
| 1     | 7.712     | 84767 | 5991   | M    | 100.000 |

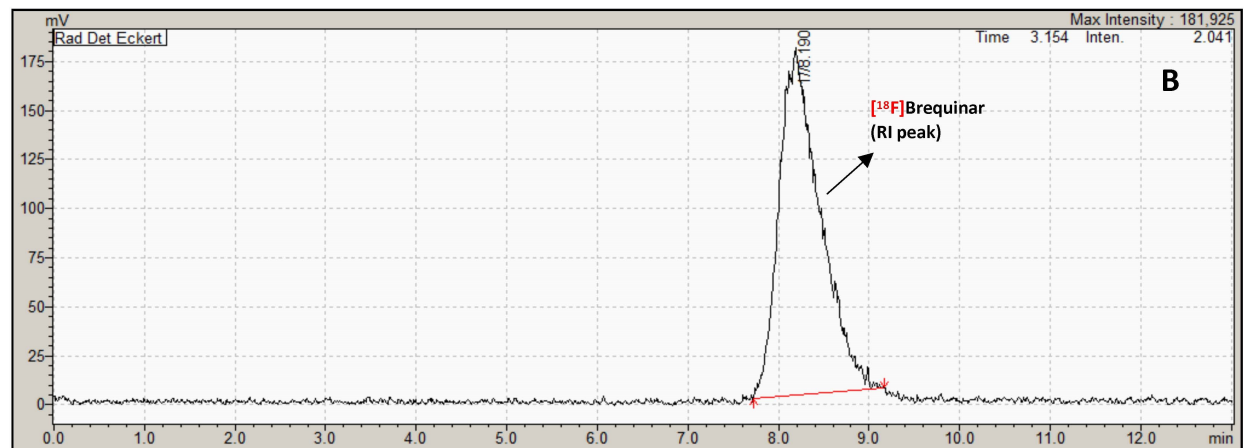

| Peak# | Ret. Time | Area    | Height | Mark | Conc.   |
|-------|-----------|---------|--------|------|---------|
| 1     | 8.190     | 5563630 | 176810 | M    | 100.000 |

Editable pictures

Supplement: d4md00433g5.pdf [file d4md00433g5.pdf]

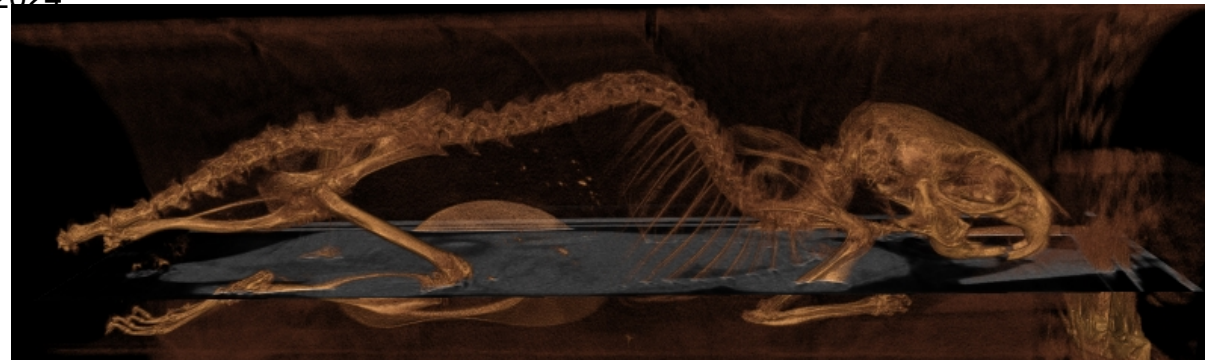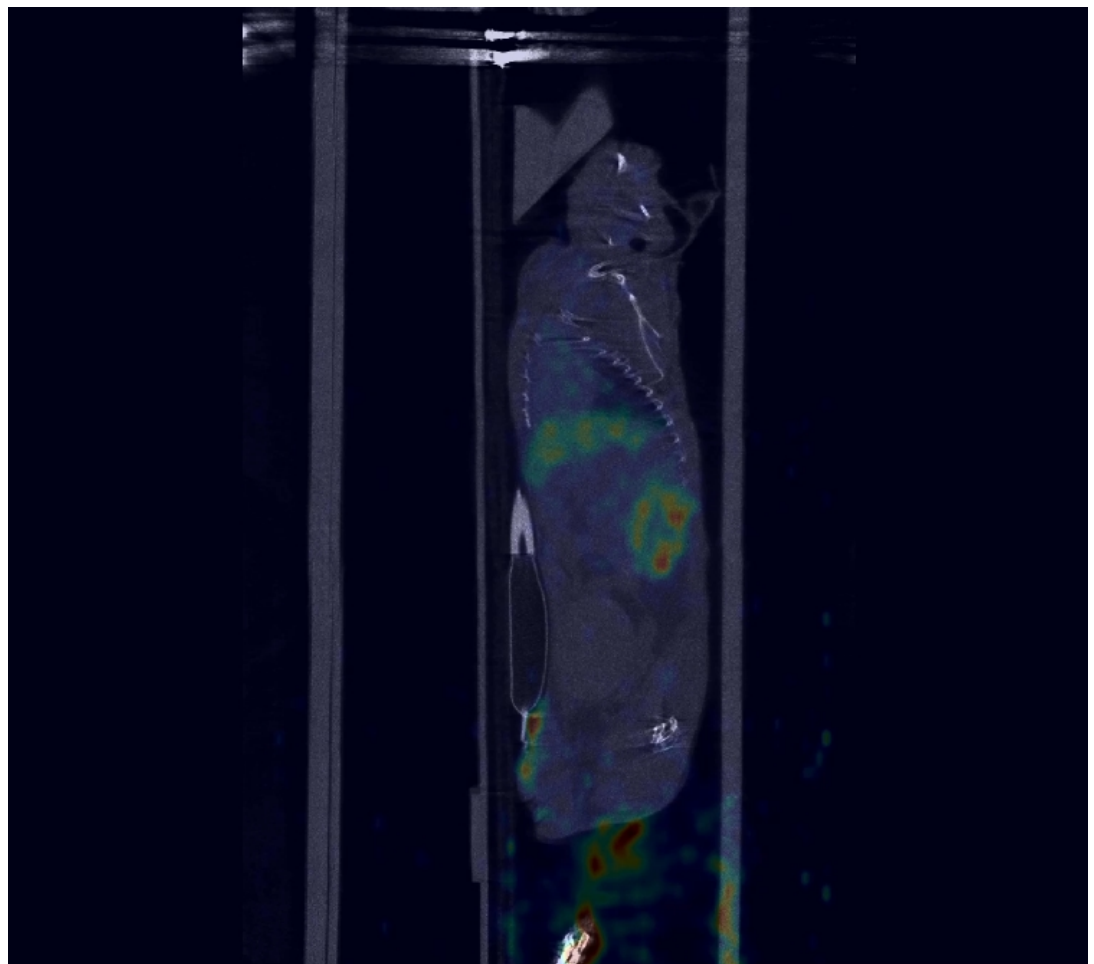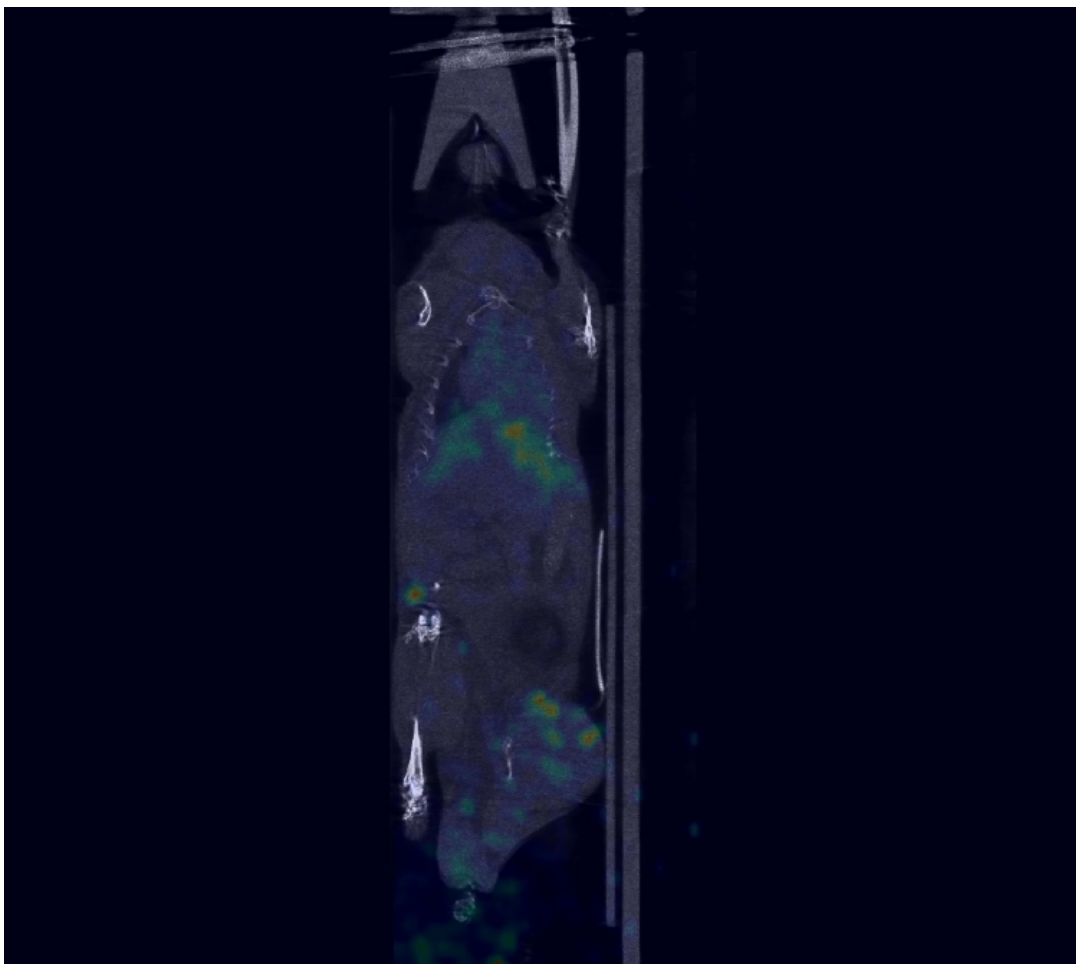

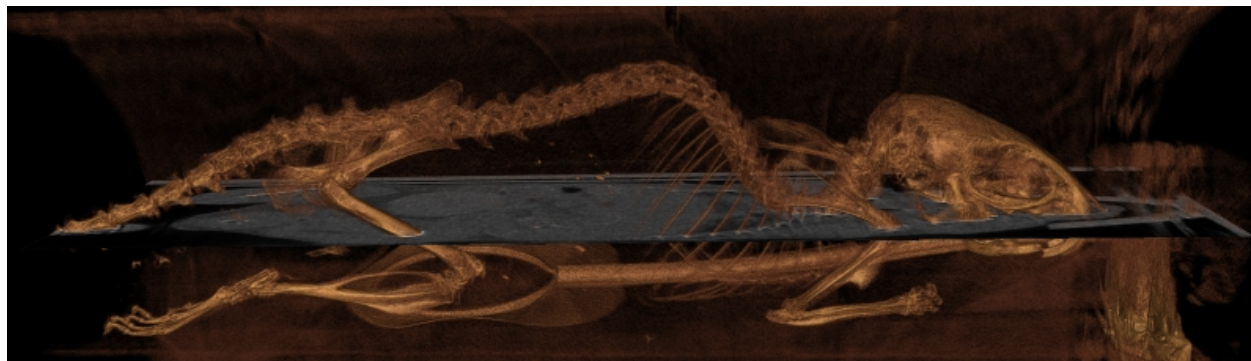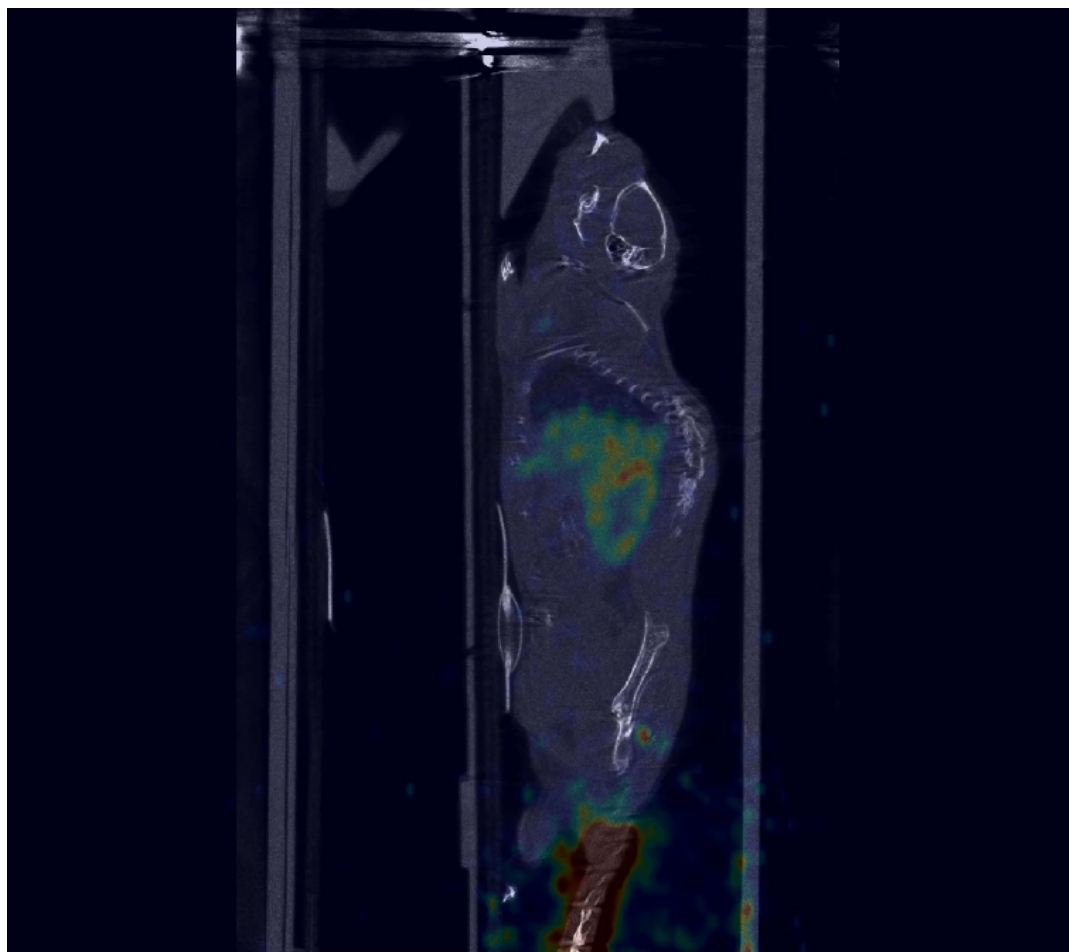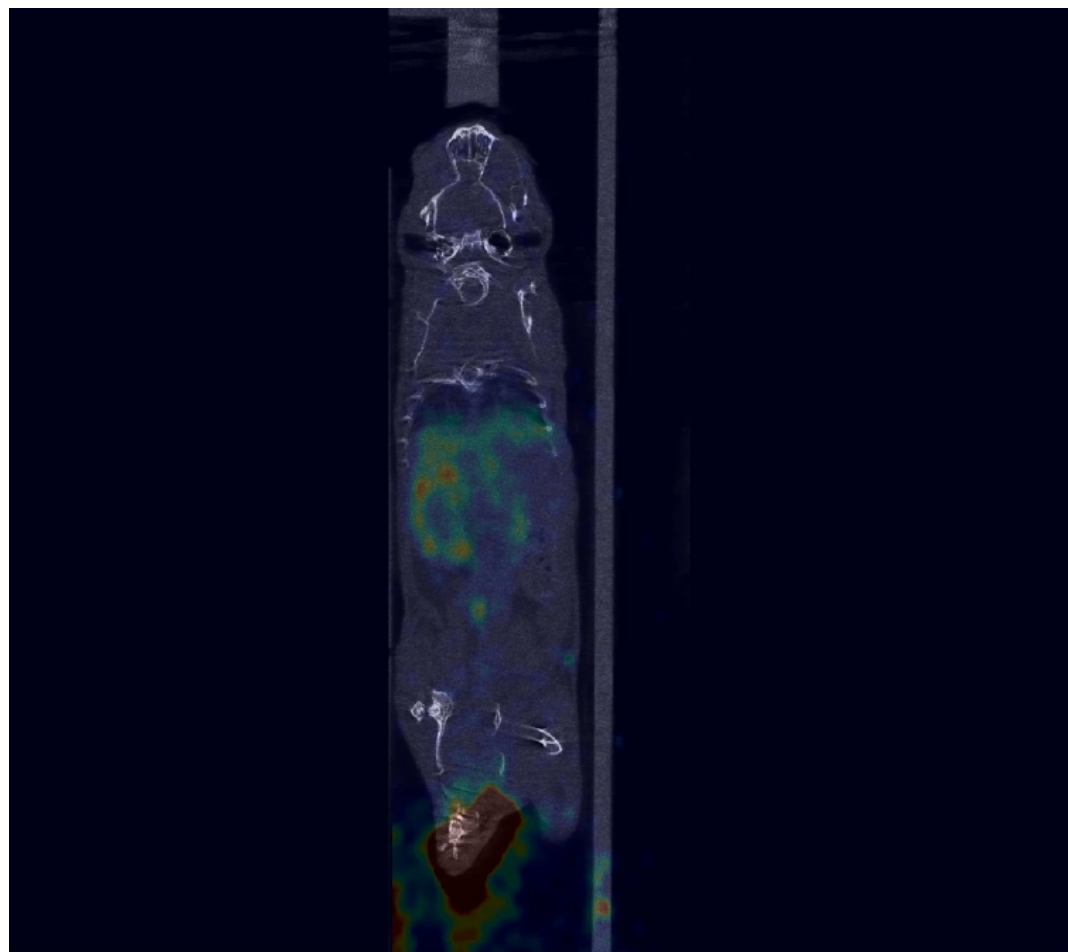

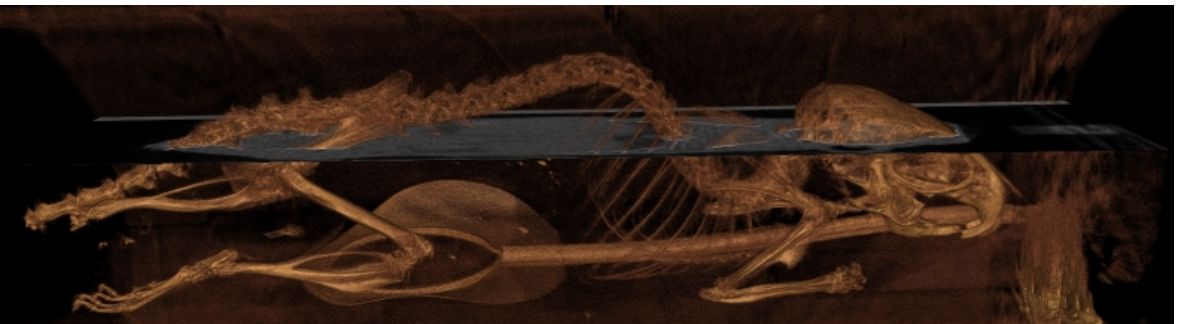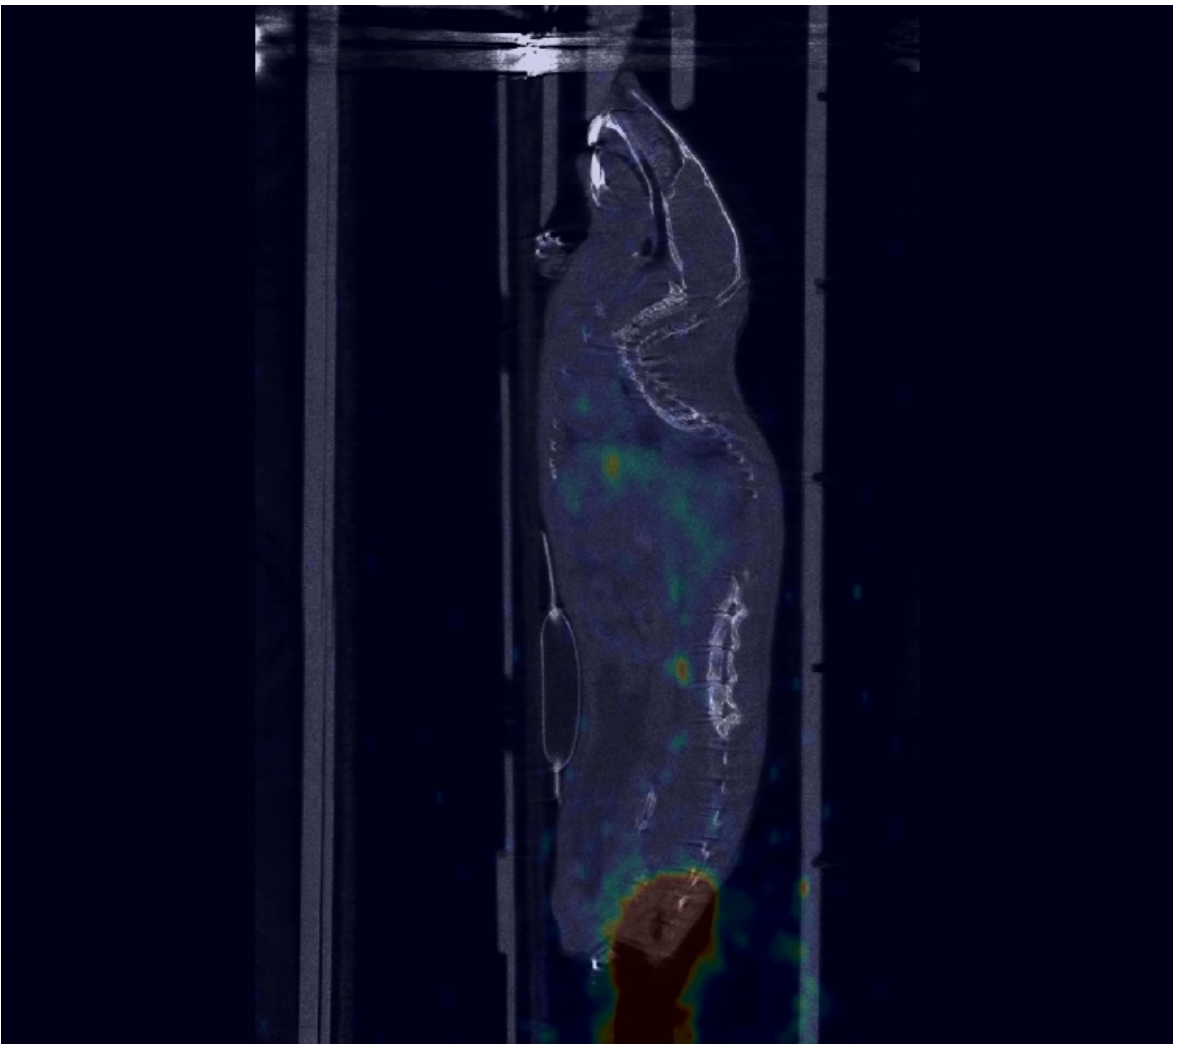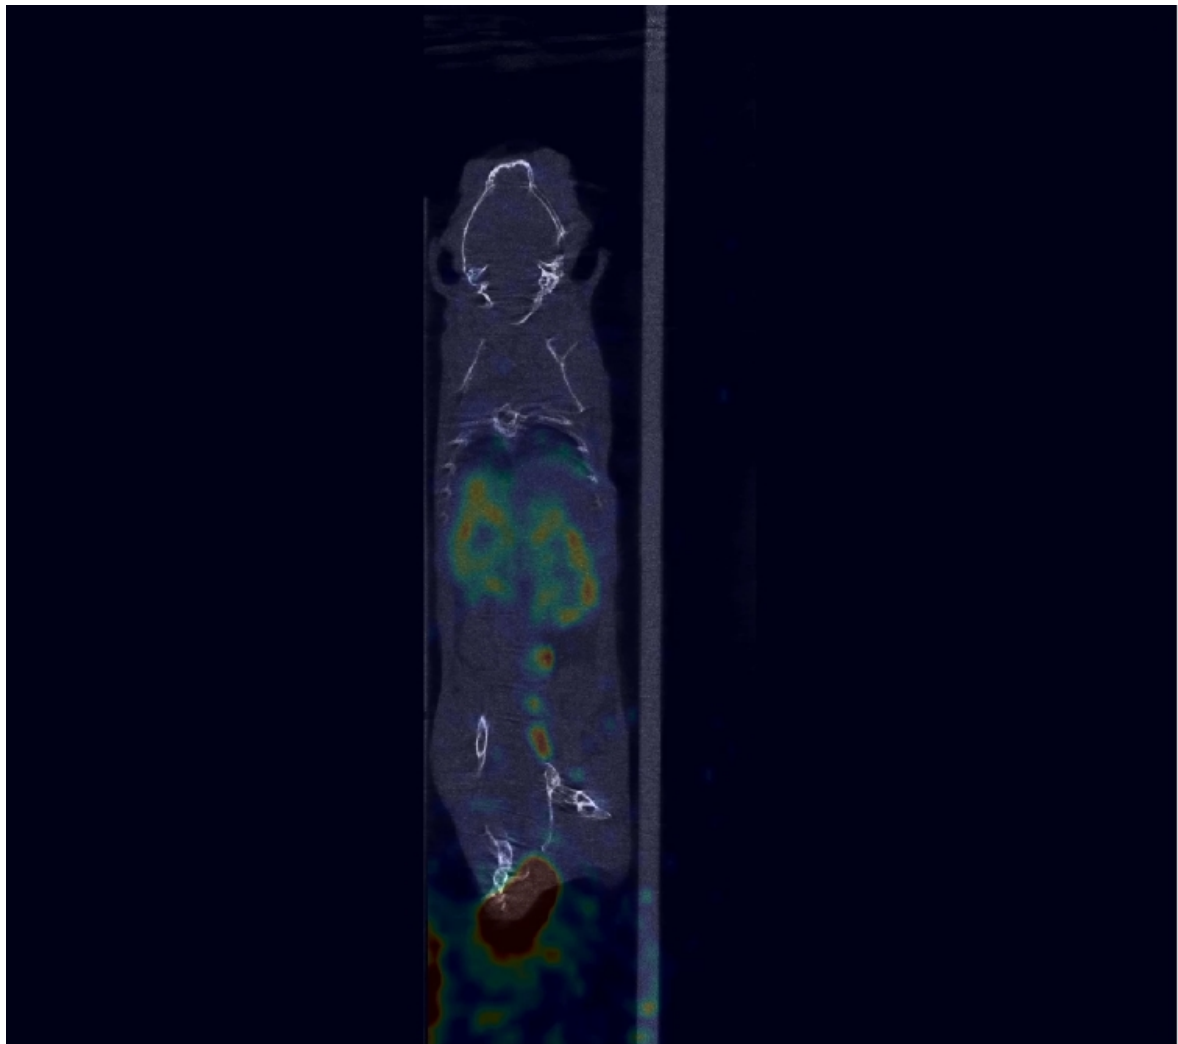

Supplement: d4md00433g6.pdf [file d4md00433g6.pdf]
